## Genomic landscape of virus-associated cancers

Karen Gomez<sup>1\*</sup>, Gianluca Schiavoni<sup>2\*</sup>, Yoonhee Nam<sup>1</sup>, Jean-Baptiste Reynier<sup>1,3</sup>, Cole Khamnei<sup>1</sup>, Michael Aitken<sup>1,4</sup>, Giuseppe Palmieri<sup>5</sup>, Antonio Cossu<sup>6</sup>, Arnold Levine<sup>7</sup>, Carel van Noesel<sup>8</sup>, Brunangelo Falini<sup>2</sup>, Laura Pasqualucci<sup>9</sup>, Enrico Tiacci<sup>2\*\*</sup>, and Raul Rabadan<sup>1,3\*\*</sup>

1. Program for Mathematical Genomics and Department of Systems Biology, Columbia University, New York, NY, USA
2. Institute of Hematology and Center for Hemato-Oncology Research, Department of Medicine and Surgery, University and Hospital of Perugia, Perugia, Italy
3. Department of Biomedical Informatics, Columbia University, New York, NY, USA
4. Department of Physics, Columbia University, New York, NY, USA
5. Immuno-Oncology & Targeted Cancer Biotherapies, University of Sassari - Unit of Cancer Genetics, IRGB-CNR, Sassari, Italy
6. Department of Medicine, Surgery and Pharmacy, University of Sassari, Sassari, Italy
7. Simons Center for Systems Biology, Institute for Advanced Study, Princeton, NJ, USA
8. Amsterdam University Medical Centers, Department of Pathology, University of Amsterdam, Amsterdam, The Netherlands
9. Institute for Cancer Genetics and the Department of Pathology and Cell Biology, Columbia University, New York, NY, USA

These authors contributed equally (\*): Karen Gomez, Gianluca Schiavoni

These authors jointly supervised this work (\*\*): Enrico Tiacci, Raul Rabadan

Corresponding Author: Raul Rabadan, [rr2579@cumc.columbia.edu](mailto:rr2579@cumc.columbia.edu)

## Summary

It has been estimated that 15%-20% of human cancers are attributable to infections, mostly by carcinogenic viruses. The incidence varies worldwide, with a majority affecting developing countries. Here, we present a comparative analysis of virus-positive and virus-negative tumors in nine cancers linked to five viruses. We find that virus-positive tumors occur more frequently in males and show geographical disparities in incidence. Genomic analysis of 1,658 tumors reveals virus-positive tumors exhibit distinct mutation signatures and driver gene mutations and possess a lower somatic mutation burden compared to virus-negative tumors of the same cancer type. For example, compared to the respective virus-negative counterparts, virus-positive cases across different cancer histologies had less often mutations of *TP53* and deletions of 9p21.3/*CDKN2A-CDKN1A*; Epstein-Barr virus-positive (EBV+) gastric cancer had more frequent mutations of *EIF4A1* and *ARID1A* and less marked mismatch repair deficiency signatures; and EBV-positive cHL had fewer somatic genetic lesions of JAK-STAT, NF- $\kappa$ B, PI3K-AKT and HLA-I genes and a less pronounced activity of the aberrant somatic hypermutation signature. In cHL, we also identify germline homozygosity in HLA class I as a potential risk factor for the development of EBV-positive Hodgkin lymphoma. Finally, an analysis of clinical trials of PD-(L)1 inhibitors in four virus-associated cancers suggested an association of viral infection with higher response rate in patients receiving such treatments, which was particularly evident in gastric cancer and head and neck squamous cell carcinoma. These results illustrate the epidemiological, genetic, prognostic, and therapeutic trends across virus-associated malignancies.

## Introduction

An estimated 15-20% of cancers are attributable to infections<sup>1,2</sup>, and 8-10% are caused by viruses<sup>3,4</sup>. To date, seven viruses are known to be associated with the development of cancers in humans (oncoviruses): human gammaherpesvirus 4 (HHV-4, also known as Epstein-Barr virus [EBV]), human herpesvirus 8 (HHV-8), human papillomavirus (HPV), human T-cell lymphotropic virus type 1 (HTLV-1), hepatitis B virus (HBV), hepatitis C virus (HCV), and Merkel cell polyomavirus (MCPyV)<sup>5</sup>. The first human oncovirus to be described was EBV, following the discovery of viral particles in cultured lymphoblasts from Burkitt lymphoma (BL) in 1964<sup>6</sup>. Since then, EBV has been linked to a wide array of both hematological and solid tumors, including Hodgkin lymphoma (HL) (20-50% of cases<sup>7</sup>), other B and T cell lymphomas (such as plasmablastic lymphoma [PBL], extranodal NK T-cell lymphomas [NKTCL], and primary central nervous system lymphoma [PCNSL] in immune-suppressed patients, each in 70-100% of cases<sup>8-10</sup>), gastric cancer (GC) (8.7% of cases<sup>11</sup>), and nasopharyngeal carcinoma (NPC) (100% of cases<sup>12</sup>), summing to approximately 1% of all cancers<sup>3</sup>. It has also been suggested that EBV may be associated to B-cell lymphomagenesis more widely than currently acknowledged, possibly via a “hit and run” mechanism<sup>13</sup>. By the 1980s, HPV, HBV, HCV, and HTLV-1 had been identified as additional oncoviruses. High-risk HPV types such as HPV16 and HPV18 contribute to the pathogenesis of cervical cancer (CC) (95% of cases<sup>14</sup>), head and neck squamous cell carcinoma (HNSCC) (30%<sup>15</sup>), and anogenital cancers (70-90%<sup>16</sup>), representing 5% of all cancers<sup>16</sup>. HBV and HCV have been associated with up to 56% and 20% of hepatocellular carcinomas (HCC)<sup>17</sup> and 2% and 1% of total cancers<sup>3</sup>, respectively. HTLV-1, the only oncogenic retrovirus yet described, is necessary for the development of adult T-cell leukemia/lymphoma<sup>18</sup>. Since the discovery of HHV-8 in AIDS patients with Kaposi sarcoma (KS) in 1994<sup>19</sup>, HHV-8 has been implicated in the pathogenesis of Kaposi sarcoma (100% of cases), primary effusion lymphoma (100%<sup>20</sup>), and Castleman’s disease (20-40%<sup>21</sup>). In 2008, MCPyV was linked to Merkel cell carcinoma (MCC)<sup>22</sup>, and has since been identified as an etiological agent in 80% of MCC tumors<sup>23</sup>. Recently, HPV42, previously classified as a “low-risk” HPV type, has been found in a majority of digital papillary adenocarcinomas<sup>24</sup>. It is suspected that viruses may play a causative role in the pathogenesis of other cancer types<sup>25,26</sup>, and there may be more oncoviruses that have yet to be discovered.

While the mechanisms of malignant transformation caused by oncoviruses differ, there are some general patterns that are observed<sup>27</sup>. First, oncoviruses cause a persistent, long-term infection, and tumors develop years after the initial infection. For example, most individuals are infected with EBV by early childhood (in developing countries) or adolescence (in developed countries)<sup>28</sup>, but an EBV-associated cancer may not develop until old age. Hepatocellular carcinoma develops 10-30 years after infection with HBV or HCV<sup>29</sup>, and cervical cancer develops 25-30 years following infection with HPV<sup>30</sup>. Second, oncoviruses encode proteins that directly contribute to malignant transformation. In HPV infected cells, the E6 and E7 oncoproteins inhibit the tumor suppressors p53 and Rb, respectively<sup>31</sup>. The vGPCR protein encoded by HHV8 induces angiogenesis and promotes cell transformation<sup>32</sup>. EBV expresses different genes depending on the viral latency program. In Burkitt lymphoma, EBV expresses a type I latency program including the protein EBNA-1, which is necessary for the replication of viral DNA and may inhibit apoptosis<sup>33</sup>. In Hodgkin lymphoma, gastric carcinoma, and nasopharyngeal carcinoma, EBV expresses a type II latency program, including EBNA-1 as well as the proteins LMP1 and LMP2, which activate the NF- $\kappa$ B and PI3K/AKT pathways<sup>33</sup>. Third, viral infection is necessary, but not sufficient for malignant transformation. Many oncoviruses are highly prevalent in the general population: 90-95% of people worldwide are infected with EBV<sup>28</sup>, 80% of individuals will acquire an HPV infection by age 45<sup>34</sup>, and MCPyV is detected in 80% of individuals in the general population by age 50<sup>35</sup>. However, only a small fraction of those infected with oncoviruses will develop cancer, suggesting additional genetic and/or environmental factors are required.

The factors that contribute to the malignant transformation of virus-infected cells remain incompletely understood, but are known to include a combination of environmental, immune, inherited, and somatic components. While many of these components have been described for individual cancer types, relatively little has been reported about the clinical and genetic factors that are common across virus-associated cancers. In this study, we investigate virus-associated oncogenesis through an integrative analysis of nine cancers for which a subset of cases are associated with five oncoviruses, using data from both published and newly collected data sets. We identify patterns of common phenotypic characteristics, somatic drivers, germline risk factors, and therapeutic responses among these malignancies. This study provides a comprehensive analysis of human cancers that develop in the context of viral infection and key factors related to their pathogenesis.

## Results

### Virus-associated cancer show unique epidemiological trends

Virus-associated cancers are known to follow unique epidemiological patterns compared to non-virus-associated cancers. For example, the age of incidence of HL follows a bimodal distribution which largely reflects two distinct histological subtypes with different etiologies: 1) nodular sclerosis, usually EBV-negative, in young adults, and 2) mixed cellularity, often EBV-positive, in older adults<sup>36,37</sup>. BL has been traditionally classified into two clinical variants, i.e. endemic BL (eBL) and sporadic BL (sBL), that present different demographic (eBL tend to be younger), geographic (most eBL are from equatorial Africa), virus status (nearly all eBL are EBV+ while a small fraction of sBL are) and somatic mutation characteristics<sup>38</sup> (this should be taken into account in BL comparisons along the manuscript).

In order to illustrate other common demographic characteristics of virus-associated malignancies, we analyzed data from the Global Cancer Observatory (GLOBOCAN 2020)<sup>39</sup> and published incidence rates in 82 studies of 11 cancer types linked to 7 viruses and 13 non-virus-associated cancers<sup>40-121</sup> (**Table S2**). First, we compared the incidence rates of viral cancers in males versus females (M/F) reported in select published studies<sup>40-121</sup> (**Figure 1A, Table S2**). We found that the M/F ratio reported was greater overall in virus-associated cancers compared to nonviral cancers ( $p=0.03$ , Mann Whitney U [MWU] test). Among studies that reported rates of male and female incidence for virus-positive and virus-negative tumors specifically, virus-positive cases tended to have a greater M/F ratio than virus-negative cases ( $p=2.4e-10$ ). This trend was consistent when separately comparing virus-positive and virus-negative tumors of gastric cancer ( $p=1.04e-10$ ) and Hodgkin lymphoma ( $p=0.015$ ), whereas no difference in the M/F ratio and viral status was observed for BL although higher rates of male vs female incidence has been reported in both eBL and sBL, with ratios ranging from 2:1 to 4:1<sup>122</sup>. A lower M/F ratio was observed in MCPyV-positive MCC compared to virus-negative MCC. Interestingly, digital papillary adenocarcinoma, which has been recently associated to HPV42, is more frequent in males compared to females at a ratio of 4 to 1<sup>123</sup>.

To examine how the incidence of virus-associated cancers differs by geographic location, we compared the age-standardized incidence rates (ASR) of 4 cancers in 185 countries reported in GLOBOCAN 2020. To identify countries with high ASR of virus-positive tumors for different virus-associated cancers, we estimated the number of cases attributable to viral infection by country from GLOBOCAN 2020 total incidence counts and the attributable fraction per region estimated by de Martel et al<sup>3</sup>. In HL, EBV-positive cases occur most frequently in North Africa, the Middle East, and South America, with the lowest incidence occurring in East Asia (**Figure 1B**). In contrast, most cases of EBV-positive NPC occur in China and southeast Asia (**Figure 1C**). Similarly, Kaposi sarcoma and cervical cancer (nearly all of which are virus-positive) show disparities in incidence by geographic location (**Figure S1**). These results illustrate that the locations of global hot spots of virus-positive tumor incidence

vary by virus and even among cancers associated with the same virus. These disparities reflect differences in risk factors for virus-positive tumors among human populations, both genetic (e.g. inherited susceptibility polymorphisms<sup>124,125</sup>) and environmental (e.g. oncovirus prevalence<sup>126</sup>, and lifestyle factors such as smoking or diet, which affect overall cancer risk<sup>127</sup>).

### **Virus-positive tumors have fewer somatic mutations than virus-negative tumors**

In order to quantify the somatic mutation burden of virus-associated cancers, we aggregated somatic mutation data from 1,658 tumors in published studies of 9 cancers subjected to whole exome sequencing (classical HL<sup>128,129</sup> [cHL] [n=56], PBL<sup>130</sup> [n=15], GC<sup>131</sup> [n=440], HCC<sup>132</sup> [n=196], CC<sup>133</sup> [n=178], and HNSCC<sup>134</sup> [n=487]), targeted DNA sequencing (PBL<sup>130,135</sup> [n=36], PCNSL<sup>136</sup> [n=58], MCC<sup>137</sup> [n=71], and BL<sup>38</sup> [n=29]), and/or whole genome sequencing (BL<sup>38</sup> [n=91] and newly sequenced cHL [n=32] [see Methods]) (**Table S1**). In general, virus-negative tumors had a higher count of nonsynonymous mutations compared to virus-positive tumors (**Figure 2A and Table S3**). The count of nonsynonymous mutations was significantly lower in virus-positive compared to virus-negative cHL (described in the next section), PCNSL (median 1 and 6,  $p=1.2e-7$ ), and HNSCC (median 94.5 and 168,  $p=1.6e-5$ ), and trended towards significance in PBL (median 1 and 4,  $p=0.080$ ), GC (median 131.5 and 169,  $p=0.088$ ), and to a lesser extent in CC (median 105 and 399,  $p=0.20$ ), and MCC (median 10 and 28,  $p=0.17$ ) (**Figure 2B**), whereas HCC trended in the opposite direction (median 129 in virus-positive vs 118 in virus-negative cases,  $p=0.12$ ). In BL, the mutation load was significantly higher in virus-positive tumors (median 53 and 42,  $p=0.00018$ ), but the count of nonsynonymous mutations in genes previously described as BL drivers<sup>38</sup> trended towards lower in the virus-negative cases (median 8 and 6,  $p=0.074$ ) (**Figure S2**), consistent with that report<sup>38</sup>. As previously mentioned, almost all EBV+ cases are eBL with unique demographic characteristics that may impact the interpretation of the results. For instance, it is known that pediatric tumors harbor less mutations than adults, which could explain the lower mutational burden of EBV+ cases. Furthermore, when restricting the analysis to driver genes, the higher mutation count in virus-negative versus virus-positive cases became statistically significant in MCC (median 5 and 1,  $p=0.029$ ) (**Figure S2**), while virus-positive GC and HCC had more driver gene mutations than their virus-negative counterparts (GC: median 3 vs 2,  $p=0.029$ ; HCC: median 2 vs 1,  $p=0.0017$ ). Overall, the total mutation count and/or driver mutation count was lower in virus-positive compared to virus-negative tumors in most cancers studied (**Figure 2C**).

### **Somatic mutations genome-wide, and alterations in JAK/STAT, NF- $\kappa$ B, PI3K-AKT, and HLA-I genes, are more frequent in EBV- cHL than EBV+ cHL**

Hodgkin lymphoma is one of the most common malignancies in adolescents and young adults, comprising approximately 12% of all cancers in individuals aged 15-29<sup>138</sup>. The incidence of the EBV-positive cHL varies according to geography, and more than 50% of cHLs in developing countries are EBV-positive<sup>7</sup>. The genetics of EBV+ cHL has not been well studied due to the technical challenges related to the rarity of tumor cells, which usually comprise just 1-5% of cells in the tumor tissue<sup>139</sup>. To address this challenge, we had laser-microdissected Hodgkin Reed-Sternberg cells (n=1200-1800 per case) along with a similar number of adjacent non-neoplastic cells from frozen lymph node sections and subjected the samples to whole genome amplification (WGA) in duplicate, as previously described<sup>128</sup> (see Methods). We sequenced 38 samples by WES and combined them with 18 additional cHLs from another published cohort<sup>129</sup> for a total of 56 cHL, 15 of which were EBV-positive, the largest cohort of EBV-positive cHL sequenced by WES yet described. We found that the number of nonsynonymous somatic mutations in EBV-positive cHL was much lower than in EBV-negative cHL (median 4.5 compared to 57, respectively,  $p=0.0013$ , MWU test, **Figure 2B**), consistent with what we observed in other virus-positive tumors and with previous results on smaller number of cHL cases<sup>128,129</sup>. Importantly, because EBV-positivity is enriched in the mixed-



cellularity (MC) histological subtype of cHL<sup>36,37</sup>, we excluded that the observed difference in somatic mutation load was associated to histology (rather than viral status) by documenting, within EBV-negative cHL, a similar somatic mutation load in the MC subtype (n=6 cases) and non-MC subtypes (n=33 cases; median of 48 and 60 nonsynonymous mutations, p=0.56).

To mitigate the potential selective pressure imposed on coding sequences we subjected to WGS 32 cHL cases (n=9 EBV-positive and 23 EBV-negative cases, of which 31 which were also included in the WES cohort). We found a considerably lower count of total clonal somatic mutations in EBV-positive than in EBV-negative cases (median of 112, range 30-3,862, and 6,826, range 9-14,564, respectively; p= 3.2e-4, MWU test, **Figure 2B**) despite similar coverage depth between these two disease groups (both median of 44X in the tumor samples [p=0.18], and 43X vs 44X in the normal samples, respectively [p=0.23]). The same pattern was found when restricting the analysis to mutations in coding regions (median of 1, range 0-19, and 50, range 0-100, respectively; p=1.2e-3, **Figure S3A**) or to nonsilent mutations (median of 1, range 0-16, and 33, range 0-82, respectively; p=9.6e-4, **Figure S3B**), consistent with the results obtained from WES data. In contrast, the fraction of short insertions/deletions among all mutation types was greater in the EBV-positive versus EBV-negative cases, suggesting potentially different underlying mechanisms (median of 22% vs 13%, respectively; p=0.024, **Figure S3C**).

Next, we investigated whether EBV-positive and EBV-negative cases cHL are preferentially associated with distinct genetic alterations, by examining the mutation frequencies of key Hodgkin lymphoma driver genes in WES data from 56 cHL cases (n=15 EBV-positive and 41 EBV-negative) (**Figure 3A**). Consistent with previous studies<sup>140,141</sup>, we found the JAK-STAT pathway members *STAT6* and *SOCS1* as the most frequently mutated genes, being affected in 24/56 cases (43%), the majority being EBV-negative (22/24, 92%). In particular, *STAT6* missense mutations of the DNA binding domain were observed in 14/41 EBV-negative cases (34%) but in only 1/15 EBV-positive cases (7%; p=0.047, MWU test) (**Figure 3B,C**). Furthermore, gains or amplifications of 9p24.1/*JAK2* were significantly enriched in EBV-negative cases (31/41, 76%, versus 6/15 EBV-positive cases, 40%; p=0.024). There were also mutations in the JAK-STAT gene *CSF2RB* in 4 cases, 3/4 of which were EBV-negative. Overall, at least 1 of these 4 JAK-STAT pathway genes was targeted by genetic lesions in 35/41 EBV-negative tumors (85%) but only 7/15 EBV-negative ones (47%; p=0.0057). Another frequently targeted pathway was NF-κB, with recurrent mutations and/or deletions of *TNFAIP3* at 6q23.3, mutations of *NFKBIE* and/or gain/amplification of *REL* at 2p16.1 being observed in 42/56 cases overall (75%) and more often in EBV-negative cases (35/41, 85%) than EBV-positive cases (7/15, 47%; p=0.0057). A third pathway more frequently mutated in EBV-negative tumors was PI3K-AKT (14/41, 34% EBV- cases vs 1/15, 7% EBV+ cases; p=0.047), including the pathway inhibitor genes *GNA13* and *ITPKB*. In particular, at least one nonsilent mutation in *GNA13* (missense or truncating events distributed throughout the coding sequence) or out-of-frame tandem duplication event was detected in 10/41 EBV-negative cases (24%), while none of the 15 EBV-positive cases had *GNA13* mutations (p=0.048). The lack of *GNA13* nonsilent mutations in EBV-positive cHL was further confirmed by targeted Sanger sequencing of an additional 18 EBV-positive cases (i.e., 33 in total) (p=0.0035) (**Figure 3D,E**). Finally, mutations in MHC-I genes (*B2M* and HLA class I A, B or C) were more frequent in EBV-negative (23/41, 56%) compared to EBV-positive (3/15, 20%) cases (p=0.032).

Copy number profiling of the 56 cHL tumors with GISTIC2.0 revealed 6 peaks of gain or amplification and 18 peaks of deletion (**Figure 3F,G and Table S5**). The burden of copy number gains was also greater in the EBV-negative cases compared to EBV-positive (median 4 and 3, p=0.0027, **Figure S4**).

## Virus-associated cancers display unique mutation signatures

To detect and quantify the relative contribution of COSMIC mutation signatures<sup>142</sup> within the nine virus-associated cancers, we next applied a supervised non-negative matrix factorization approach informed by *de novo* signature calling. Virus-positive tumors exhibited different activities of mutation signatures compared to virus-negative tumors of the same cancer type (**Figure 4, Figure S5, and Tables S7, S8**).

In cHL, the detected mutation signatures (n=10) included, among others, SBS5/age, SBS9/somatic hypermutation (SHM), SBS85/activation-induced cytidine deaminase (AID) and SBS2/13/ apolipoprotein B mRNA editing enzyme, catalytic polypeptide (APOBEC) (**Fig. 4A, left**). The absolute count of mutations ascribed to each signature was significantly lower in EBV-positive versus EBV-negative cases (**Figure S5A**). For SBS2/APOBEC, even the relative signature activity (i.e., the proportion of signature mutations among all mutations observed in each case) was lower in EBV-positive compared to EBV-negative tumors (mean proportion 0.0079 and 0.047, respectively,  $q=0.11$ ) (**Figure 4A, right**). APOBEC enzymes belong to a family of cytidine deaminases that includes AID, and a previous study focused on a few selected genomic regions showed that the AID-mediated process of SHM functions aberrantly in cHL<sup>143</sup>. Our unbiased analysis revealed that the inferred SHM signatures SBS9 and SBS85 had higher absolute activity in EBV-negative versus EBV-positive cases genome-wide (**Figure S5A**). Additionally, we found that mutations occurring in regions within 2 kb of the transcription start site of 126 genes known to be targeted by aberrant SHM (ASHM) in diffuse large B-cell lymphomas (DLBCL)<sup>144</sup> were enriched in EBV-negative compared to EBV-positive cHL (median 4 and 0 mutations per mB,  $p=0.045$ , MWU test; **Fig. 4A, right**). There were also a greater number of uniquely mutated ASHM-target genes and a greater number of mean mutations per ASHM gene in the EBV-negative than the EBV-positive patients (**Figure S6**). Collectively, these data suggest in EBV-negative cHL a more pronounced selective pressure for somatic mutations induced by APOBEC and AID activities that in EBV-positive cHL might be substituted by oncogenic activities of viral proteins. Finally, regarding the clock-like signature SBS5/age, its absolute activity did not correlate with age overall, nor separately in EBV-negative and EBV-positive cases ( $R^2 < 0.2$ ), in agreement with a previous report on a smaller number of cases<sup>129</sup>.

UV light is known to be the major etiological agent of MCC tumors in the absence of viral infection. Accordingly, the absolute count of mutations attributed to SBS7a/7b/UV light was lower in MCPyV-positive compared to MCPyV-negative (**Figure S5B**). MCPyV-positive MCC cases also displayed a lower proportion of mutations associated with each UV light signature (SBS7a/b) compared to -negative cases (mean 0.044 and 0.13,  $q=0.023$  and mean 0.11 and 0.28,  $q=0.0019$ , respectively) (**Figure 4B**).

In GC, among mutation signatures differentially active by virus status (**Figure 4C and Figure S5C**), of potential interest is the greater relative and/or absolute activity of SBS20, SBS15, and SBS21 mismatch repair (MMR) deficiency signatures in EBV-negative versus EBV-positive cases. For example, mean relative activity of SBS15 is greater in EBV-negative than EBV-positive cases (mean 0.15 and 0.076, respectively;  $q=0.0026$ ). These findings suggest a greater role for microsatellite instability (MSI) in the pathogenesis of EBV-negative GC. MSI as assessed by standard methods is a defining characteristic of a GC subtype that is exclusively EBV-negative and comprised 73/406 (18%) of EBV-negative patients in the TCGA cohort. Accordingly, the relative activities of SBS20, SBS15, and SBS21 were greater in the conventionally defined MSI subtype compared to the other EBV-negative cases (mean 0.11 and 0.010,  $p<2.2e-16$ ; mean 0.30 and 0.12,  $p<2.2e-16$ ; and mean 0.071 and 0.0071,  $p=4.86e-9$ , respectively). The absolute and relative activity of SBS15 was also greater in non-MSI EBV-negative compared to EBV-positive tumors (**Table S9**), suggesting that MSI may be more widespread in EBV-negative GC than currently appreciated with standard methods.

There was no significant difference in the absolute counts or proportions of signatures in HPV-positive versus -negative CC, likely due to the limited number (n=7) of HPV-negative cases reported in TCGA (**Figure 4D, Figure S5D**). However, in HNSCC, HPV-negative cases

had a greater number of ID3 and DBS2 mutations related to smoking (**Figure S5E**), a known risk factor for HNSCC that may be less relevant for HPV-driven carcinogenesis<sup>145</sup>. In contrast, HPV-positive HNSCC had higher absolute and relative activity of SBS2/APOBEC (**Figure S5E and Figure 4E**), a finding consistent with the hypothesis that HPV oncoproteins may increase APOBEC3A and APOBEC3B expression and mutagenic activity<sup>145,146</sup>.

In HCC, there was no difference in absolute count of mutations attributed to mutation signatures (**Figure S5F**), consistent with the similar mutation burden in virus-positive and -negative HCC overall. However, HCC tumors positive for HBV and/or HCV had a greater proportion of mutations due to SBS24/aflatoxin, an environmental carcinogen known to predispose to HBV/HCV-mediated cirrhosis<sup>147,148</sup> (mean 0.16 and 0.085  $q=0.021$ ) (**Figure 4F**).

In BL exomes (assessed using the reported exonic mutations from the original study<sup>149</sup>), we found a greater absolute and relative activity of SBS17b (a signature of unknown etiology) in EBV-positive compared to EBV-negative cases (**Figures 4G and S5G**), consistent with the original analysis of genome-wide mutation signatures in the same cohort of cases<sup>38</sup>. In partial contrast with that analysis, we did not detect the SBS9/pol $\eta$  signature associated to non-canonical AID activity that was previously found in the BL genomes<sup>38</sup>; and we identified in EBV-positive versus negative cases a higher absolute activity of a MMR-deficiency related signature (SBS6) distinct from that (SBS15) observed in the BL genomes<sup>38</sup>, as well as a higher (rather than similar<sup>38</sup>) load of mutations related to the clock-like signature SBS5 (whose absolute activity was not correlated with age, in the cohort overall or in EBV-positive or EBV-negative cases individually [ $R^2 < 0.1$ ]).

Overall, these results illustrate that the signatures of somatic mutation processes vary depending on infection status for each cancer, highlighting differing selective pressures on the cancer genomes in the presence or absence of viral oncoproteins.

### **Virus-positive tumors harbor frequent mutations in RNA helicases *DDX3X* and *EIF4A1***

In order to identify genomic loci that are preferentially mutated in virus-positive tumors, we compared the rate of nonsynonymous mutations in the pooled cohort of 537 virus-positive tumors and 1,121 virus-negative tumors from 9 cancer types. We found that four genes had an elevated odds of mutation in virus-positive tumors compared to virus-negative tumors: *EIF4A1* (OR 69.43, 95% CI 4.15-1160.26,  $q=2.37e-5$ , MWU test, BH corrected), *DDX3X* (OR 7.07, 95% CI 4.06-12.31,  $q=2.25e-11$ ), *ARID1A* (OR 2.49, 95% CI 1.72-3.58,  $q=7.1e-4$ ), and *MYC* (OR 3.92, 95% CI 2.57-6.01,  $q=8.67e-8$ ), although the latter was driven by GC exclusively (OR 6.13, 95% CI 0.54-70.01,  $q=0.38$ ). (**Figure 5A, Table S11**). When looking at individual cancer types, *EIF4A1* had a significant OR of mutation in EBV-positive GC compared to EBV-negative GC (OR 63.09, 95% CI 2.94-1352.57,  $q=4.21e-6$ ) and showed a similar trend in BL (OR 7.92, 95% CI 0.45-140.54,  $q=0.12$ ) (**Figure S7, Table S11**). *DDX3X*, an RNA helicase in the same family as *EIF4A1*,

had a nominally elevated OR of mutation in EBV-positive cHL (OR 8.78, 95% CI 0.34-228.59,  $q=0.34$ ), HNSCC (OR 3.73, 95% CI 0.61-22.85,  $q=0.34$ ), BL (OR 1.86, 95% CI 0.76-4.53,  $q=0.34$ ), and GC (OR 1.64, 95% CI 0.083-32.72,  $q=0.74$ ), though no cancer reached significance individually. To increase the statistical power of the association we combined data from six different BL genomic studies<sup>38,150-154</sup> including eBL and sBL ( $n = 145$  and  $174$ , respectively) as well as EBV status (143 EBV-positive and 116 EBV-negative). We found that *DDX3X* mutation was strongly (though not exclusively) associated with EBV-positive status (OR 3.67 95% CI 2.14-6.28,  $p < 0.001$ ) and endemic subtype (OR 4.12 95% CI 2.55-6.67,  $p < 0.001$ ) (**Table S12**). *ARID1A* was significantly mutated in EBV-positive GC (OR 15.11, 95% CI 6.16-37.05,  $q=3.30e-12$ ) but also trended towards an elevated OR in virus-positive HCC (OR 2.86, 95% CI 0.99-8.28,  $q=0.087$ ), BL (OR 1.70, 95% CI 0.67-4.30,  $q=0.35$ ), and cHL (OR 1.42, 95% CI 0.12-17.03,  $q=0.81$ ). Conversely, *TP53* had an elevated odds of mutation in virus-negative tumors compared to virus-positive tumors (OR 8.58, 95% CI 6.40-11.50,  $q=5.8e-51$ ) (**Figure**



**5A**), which was significant for most cancer types individually (**Figure S7**). Analysis of recurrent copy number aberrations also revealed recurrent loss of 9p21.3 (*CDKN2A*, *CDKN1A*) in virus-negative tumors (**Figure S8**).

*EIF4A1* and *DDX3X* are RNA helicases of the DEAD (Asp-Glu-Ala-Asp) box protein family which are known to play a role in splicing, RNA export, and cap-dependent translation initiation<sup>155</sup>. In order to further explore the role of these genes in virus-associated cancers, we expanded the analysis of *EIF4A1* and *DDX3X* mutations to include 316 tumors from cancers that are virus-associated in almost 100% of cases: KS (10 newly sequenced cases), aggressive NK cell lymphoma (ANKL)<sup>156</sup> (n=14), ATL<sup>157</sup> (n=81), NKTCL<sup>158</sup> (n=100), and NPC<sup>159</sup> (n=111) (**Table S1**), for a total of 1,974 cases. In all, we identified 135 *DDX3X* nonsynonymous mutations (100 in virus-positive; 35 in virus-negative cases) and 27 *EIF4A1* nonsynonymous mutations (22 in virus-positive; 5 in virus-negative cases).

Among virus-positive tumor samples, somatic mutations in *DDX3X* were detected in 53% (50/93) BL, 29% (4/14) ANKL, 19% (19/100) NKTCL, 7% (1/14) cHL, 5% (4/81) ATL, 3% (1/30) PBL, 3% (2/60) HNSCC, and 2% (3/144) of CC (**Table S13**). Mutations in *DDX3X* tended to occur in the helicase domain residues more frequently than expected by chance ( $p=4.0e-4$ , binomial test) suggesting selective pressure for a functional role (**Figure 5B**). This was similar for virus-positive cases only ( $p=0.0020$ ) as well as virus-negative only ( $p=0.15$ ). Furthermore, the proportion of mutated residues in the helicase domain was significantly greater than that of the DEAD domain ( $p=0.0051$ , Fisher's exact test) and the region of the protein preceding the DEAD domain from amino acids 1-203 ( $p=0.0002$ , Fisher's exact test). The *DDX3X* gene is located on the X chromosome and was previously reported to escape X inactivation in females<sup>160</sup>. Both truncating events and at least some missense mutations in *DDX3X* have been previously described as causing functional loss of protein activity<sup>154</sup>. Notably, while only 60% of patients were male (910/1529 with available data), *DDX3X* mutations that were truncating occurred almost exclusively in males (19/20, 95%) (**Figure 5C**), consistent with a previous study<sup>161</sup>. This was similarly evident in virus-positive (10/10, 100%) and virus-negative (9/10, 90%) cases separately. As 50% of patients with nonsynonymous *DDX3X* mutations were from the BL cohort (61/123 cases), we focused on this disease to evaluate the relationship between mutation status and *DDX3X* expression, using previously published RNA-sequencing data<sup>38</sup>. We found that male patients lacking somatic *DDX3X* mutations had a significantly lower expression of *DDX3X* compared to *DDX3X* unmutated female patients (median 13.79 and 14.50,  $p=2.4e-6$ , MWU test), consistent with escape from X inactivation<sup>160</sup>. Cases with missense mutations in *DDX3X* had an elevated expression of *DDX3X* irrespective of sex compared to cases with no mutations in *DDX3X* (median 15.04 and 14.24,  $p=1.2e-9$ ), potentially suggesting that overexpression of missense mutants may favor their ability to decrease *DDX3X* function, while cases with truncating mutations (9 EBV+; 4 EBV-) had a lower expression (median 12.23 and 14.24,  $p=1.79e-5$ ) (**Figure 5D**), consistent with them being loss-of-function events. Similarly, in the TCGA study of HNSCC, expression of *DDX3X* was lower in unmutated male cases compared to unmutated female cases (median 12.58 and 12.99,  $p<2.2e-16$ ), and was also lower in cases (3 HPV+; 2 HPV-) with truncating mutations compared to unmutated cases (median 10.37 and 12.71,  $p=1.5e-4$ ) (**Figure S9**). Together, these results suggest that mutations in *DDX3X* and *EIF4A1* may play a role in virus-positive tumors in various types of cancer (**Figure 5E**).

### **HLA-I homozygosity is a germline risk factor for EBV-positive Hodgkin lymphoma**

The major histocompatibility complex class I (MHC-I) plays an essential role in the adaptive immune response to viral infection and oncogenesis. In a previous study focused on diffuse large B cell lymphoma<sup>162</sup>, we incidentally observed that, within the UK BioBank cohort of 502,506 individuals<sup>163</sup>, cHL is one of the cancer types most strongly associated with germline HLA-I homozygosity (156/562 of cases, 28%;  $p=0.005$  [binomial test] versus 21% of the normal

population from UK), potentially suggesting a decreased ability to present antigens (including viral ones) as a risk factor for this cancer. Other virus-associated tumors did not show a significantly high rate of HLA-I homozygosity in the UK BioBank (**Figure S11**).

Because the tumor virus status is not available in the UK BioBank, we then set out to investigate the role of germline allele type of the three major HLA-I genes (*HLA-A*, *HLA-B*, and *HLA-C*, encoding the heavy chain subunit of the MHC-I) in 8 virus-associated cancer types by performing germline HLA-I typing in a total of 1,255 patients annotated for tumor virus status. This analysis revealed that EBV-positive cHL had the highest rate of germline homozygosity in at least one HLA-I gene (8/15 cases, 53%), which was significantly higher than expected based on the rate in the general population (21%) estimated from a subset of the GTEx database<sup>164</sup> (**Figure 6A**). EBV-positive cHL had a higher rate of homozygosity in *HLA-C* individually compared to EBV-negative cases ( $p=0.0039$ , Fisher's exact test), and a similar trend was seen for *HLA-B* ( $p=0.17$ ) (**Figure S10, Table S14**). While no individual HLA-I allele was significantly enriched in the small number of EBV-positive cases available, the HLA-A\*02\*01 allele was more frequent in the EBV-negative than EBV-positive cases (32% [13/41] versus 0%,  $p=0.012$ ), consistent with what has been observed in larger population studies of HLA-I allele type in cHL<sup>165</sup> (**Figure 6C**). These findings suggest germline HLA-I homozygosity may be an inherited risk factor for the development of EBV-positive cHL, possibly due to a reduced diversity of MHC molecules available for viral antigen presentation.

Of note, cHL patients with germline homozygosity in HLA-I displayed unique phenotypic characteristics compared to those that are germline heterozygous. Specifically, they were mostly male (9/16 [56%] patients in our WES-sequenced cohort; versus 16/40 [40%], in germline heterozygous patients) and older than patients heterozygous for HLA-I (median age 52.5 in homozygous, 28.5 in heterozygous;  $p=0.074$ , MWU test). Within the UK BioBank, cHL patients who were fully heterozygous exhibited a bimodal diagnosis age curve with a larger peak from age 20-30 and a smaller peak at age 60. In contrast, cHL patients who were fully homozygous in all three HLA-I loci exhibited a diagnosis age curve with the greatest peak at ages 50-60, following a different age distribution compared to heterozygotes ( $p=0.072$ , Kolmogorov-Smirnov [KS] test) (**Figure 6B**). These patterns are consistent with the known enrichment of EBV-positive cases among older versus younger cHL patients in Western countries and may reflect a higher frequency of germline HLA-homozygous cases within the EBV-positive subtype in the UK BioBank cohort.

Next, we assessed the distribution of somatic variation at HLA-I and *B2M*, which encodes the beta-2 microglobulin subunit of the MHC-I complex, in our cohort by EBV infection status. Missense or truncating mutations in one or more HLA-I loci were detected in 17/56 cases, including 8/56 in *HLA-A*, 11/56 in *HLA-B*, and 5/56 in *HLA-C* (**Figure 3A** and **Table S15**). For all HLA-I loci, the majority of patients with missense or truncating mutations were EBV-negative: 8/8 for *HLA-A* ( $p=0.093$ ), 10/11 for *HLA-B* ( $p=0.25$ ), and 6/6 for *HLA-C* ( $p=0.31$ , Fisher's exact test), collectively reaching statistical significance despite the small number of cases ( $n=16/41$  EBV- cases, 39%, versus 1/15 EBV-positive cases, 7%;  $p=0.023$ ). 2/56 cases (both EBV-negative) had biallelic nonsynonymous mutations in at least one *HLA-I* gene, and 1 case had biallelic truncating mutations in *HLA-B*. An additional 12/56 cases harbored missense or truncating mutations in *B2M* (detected through WES and/or Sanger sequencing<sup>128</sup>), and 3/56 cases (3/3 EBV-negative) harbored a missense or truncating mutation in both *B2M* and at least one HLA-I gene. In total, 26/56 (46%) cases were mutated in HLA-I or *B2M*, the majority of which (23/26, 88%) were EBV-negative ( $p=0.032$ ; Fig. 3A). The count of nonsynonymous mutations in HLA-I per patient was greater in EBV-negative than EBV-positive cases (**Figure 6D**), consistent with the trend for greater somatic mutation load in EBV-negative cases seen genome-wide (**Figure 2, Figure S4**). Similarly, somatic loss of heterozygosity caused by allele deletion tended to occur more often in EBV-negative than EBV-positive cases (11/11 [100%] versus 5/7 [71%] evaluable cases,  $p=0.14$ , MWU test) (**Figure 6E**). Overall, EBV-negative cHL

more frequently carried somatic lesions potentially disturbing MHC-I presentation of tumor neo-antigens, which in turn are likely more numerous in this group than in EBV-positive cHL, due to higher somatic mutation burden (analogous to carcinogen induced-tumors such as lung carcinoma and melanoma)<sup>32</sup>.

### **Virus-associated cancers exhibit more frequent responses to immunotherapy**

*PD-L1* overexpression has been linked to better overall survival in patients treated with immune checkpoint inhibitors (ICI) in several tumor types, including gastric cancer<sup>166</sup>, head and neck cancers<sup>167</sup>, and Merkel cell carcinomas<sup>168</sup>. *PD-L1* expression has been associated with infection by oncoviruses including EBV<sup>169</sup>, HPV<sup>170</sup>, HBV<sup>171</sup>, and MCPyV<sup>168</sup>. To determine whether virus positivity might be a useful marker for response to ICI therapy, we evaluated the correlation of viral status with response to ICI therapy with anti-PD(L)1 in 39 studies reported on ClinicalTrials.gov that had available therapy response and virus infection status data, representing four virus-linked cancers (**Table S16**).

Virus positivity was significantly associated with ICI therapy response in GC (OR 2.27, 95% CI 1.17-4.29,  $p=0.011$ , Fisher's exact test) and HNSCC (OR 1.89, 95% CI 1.27-2.82,  $p=0.0012$ ), but not MCC (OR 1.09, 95% CI 0.49-2.45,  $p=0.85$ ) or HCC (OR 1.27, 95% CI 0.94-1.73,  $p=0.12$ ) (**Figure 7A**). The same tumors displayed significant association between *PD-L1* expression and ICI therapy response, including GC (OR 3.85, 95% CI 2.29-6.72,  $p<1.0e-5$ ), HCC (OR 1.52, 95% CI 1.08-2.13,  $p=0.012$ ), and HNSCC (OR 1.89, 95% CI 1.01-3.80,  $p=0.045$ ), whereas a trend was observed in MCC (OR 2.25, 95% CI 0.76-7.63,  $p=0.15$ ). As expected, higher tumor mutational burden (TMB) was associated with ICI therapy response in both GC (OR 3.55, 95% CI 2.09-6.08,  $p=7.74e-7$ ) and HNSCC (OR 4.31, 95% CI 3.25-5.71,  $p<2.2e-16$ ), the only two cancer types with such data available.

In order to determine whether virus positivity is an independent marker of ICI therapy response, we compared the expression of *PD-L1* [*CD274*] in TCGA's studies of GC<sup>131</sup>, HCC<sup>132</sup>, and HNSCC<sup>134</sup>. *CD274* expression was higher in virus-positive GC compared to virus-negative GC (median 103.03 and 34.81,  $p=1.3e-7$ ), but this was not the case in HCC or HNSCC (**Figure 7B**). This is independent from TMB, as virus-positive GC and HNSCC have fewer mutations than virus-negative GC and HNSCC, respectively (Figure 2B). These results suggest that EBV-positive status could be a positive prognostic marker for patients undergoing ICI therapy for gastric and head and neck cancers associated with EBV infection, which may be correlated with *PD-L1* expression in GC but may represent an independent marker in HNSCC.

## **Discussion**

This study provides insights into the epidemiological, inherited, somatic, and immune components commonly implicated in the pathogenesis of cancers associated with oncoviruses. Through analysis of cancer incidence rates reported in a selection of published studies, we noted virus-associated cancers display greater incidence in males compared to females relative to non-virus-associated cancers. The greater incidence of virus-associated cancers in males may be caused in part by immunologic predisposition towards viral infection compared to females. For example, males infected with HBV are more likely to become viral carriers, whereas females infected with HBV are more likely to develop antibodies indicative of recovery and immunity to the virus<sup>172</sup>. In general, females have a more robust immune response to infection than males, which has been attributed to X-chromosome inactivation and regulation of the immune response by genetic, hormonal, and environmental mediators<sup>173,174</sup>.

Through a large-scale analysis of DNA sequencing data from 1,658 tumors collected from different studies, we found that virus-positive tumors generally display a lower mutation load compared to virus-negative tumors. It has been hypothesized that the oncogenic activity of virus-encoded proteins removes selective pressure for somatic mutations. For example, in cHL,

the rarity of mutations in the PI3K-AKT signaling inhibitor *GNA13* in EBV-positive cases may be explained by the activity of LMP2a, which has been shown to activate the PI3K/AKT pathway<sup>175</sup>. However, unlike the other virus-associated cancers, virus-positive hepatocellular carcinomas and BLs (comprised mostly but not exclusively of eBL) have a greater mutation load compared to virus-negative cases. In HCC, this may reflect increased genomic instability of virus-positive HCC tumors resulting from integration of HBV into the host cell genome<sup>176,177</sup>, and/or the activity of HCV oncoproteins that inhibit DNA repair and induce double-stranded breaks in the DNA<sup>178</sup>. The greater genome-wide mutation load in EBV-associated BL has been attributed, at least in part, to the presence of mismatch repair and *AICDA*-mediated ASHM signatures in these cases, though the mechanism of mutagenesis by EBV in BL is yet to be elucidated<sup>38</sup>. Yet, EBV-positive BL had a lower driver mutation load compared to EBV-negative BL, which may be attributed to the activity of viral proteins such as EBNA1 that reduce selective pressure for drivers genetic lesion seen commonly in virus-negative Burkitt lymphomas<sup>38</sup>. Interestingly, we found evidence for decreased ASHM in EBV-positive cHL compared to EBV-negative cHL, showing the opposite trend from that seen in BL. This finding highlights how mutation processes may differ even in cancers associated with the same virus, potentially related to the translation of distinct viral oncoproteins from different viral latency programs.

We found that somatic mutation of the RNA helicase protein *DDX3X* was more frequent in virus-positive tumors compared to virus-negative tumors overall and for a variety of individual cancer types. *DDX3X* is a member of the DEAD (Asp-Glu-Ala-Asp) box protein family involved in multiple functions related to RNA metabolism, including transcription regulation, splicing, RNA export, and translation initiation<sup>160</sup>. *DDX3X* additionally functions as a component of the innate immune signaling pathway and is known to inhibit replication of viruses such as HBV by activating production of IFN-beta<sup>160,179</sup>. Some RNA viruses, including HCV and HIV, exploit functions of *DDX3X* to aid in viral replication<sup>160,179</sup>. In cancer, *DDX3X* has been described as both a tumor suppressor and an oncogene in different cancer types and even among different tumors of the same cancer type<sup>180</sup>. *DDX3X* is expressed in many tissues of the body and escapes X chromosome inactivation<sup>160,180</sup>. The relatively high frequency of mutations in *DDX3X* in virus-positive tumors and the near-exclusive male bias for truncating mutations suggests loss of function of *DDX3X* may contribute to the pathogenesis of some virus-associated cancers, particularly BL, which had the highest frequency of *DDX3X* mutations in this study and for which similar findings were recently reported in another study<sup>161</sup>. It is worth noticing that *DDX3X* mutations although enriched did not occur exclusively in EBV-positive BLs. Gong and colleagues reported<sup>154</sup> the role of *DDX3X* and its Y-chromosome paralog *DDX3Y* in facilitating MYC-driven lymphomagenesis. Given the pleiotropic role of *DDX3X* in viral recognition and RNA processing and its higher mutational frequency in viral related tumors beyond MYC-driven lymphomas, it will be interesting to molecularly dissect the dual role of these mutations in viral and cell processes leading to tumor development.

The greater frequency of *TP53* mutations in virus-negative compared to virus-positive tumors found in this analysis may reflect how viral oncoproteins inhibit the activity of tumor suppressors. EBV-encoded oncoproteins have been shown to inhibit tumor suppressive functions of p53 and other proteins in the p53 family<sup>181</sup>. Similar functions have been observed in other herpesviruses, including HHV8 (associated with KS)<sup>181</sup>. The E6 and E7 proteins encoded by HPV inhibit p53 and Rb, respectively<sup>31</sup>. In these and other cancers, the lower frequency of *TP53* mutations may reflect the lack of selective pressure for *TP53* mutations due to the disruption of p53 functions by viral oncoproteins.

The results of our study indicate the immune response plays a critical role in the risk, development, and/or response to therapy of virus-positive tumors. Alterations in MHC-I were found to follow a trend in cHL specifically, where somatic inactivating events were more frequent in virus-negative compared to virus-positive tumors, possibly to limit the presentation of neoepitopes generated by the higher mutation burden in EBV-negative cHL, whereas germline



homozygosity of HLA-I was more frequent in EBV-positive cHL, possibly to limit the presentation of viral antigens. Consistent with this finding, cHL had an elevated rate of germline HLA-I homozygosity compared to normal individuals in the UK BioBank, and cHL cases homozygous in all three HLA-I loci tended to be older patients, a group known to be enriched for EBV-positivity compared to young adult cHL. More frequent germline HLA-I homozygosity in EBV-positive cHL as a means to reduce viral antigen presentation, and more frequent somatic HLA-I inactivation in EBV-negative cHL as a means to reduce tumor antigen presentation, may contribute to explain the observations that normal HLA-I surface expression by cHL tumor cells is largely preserved in EBV-positive cases and largely lost in EBV-negative cases<sup>182</sup>, respectively. It remains to be explained why germline HLA-I homozygosity was not increased in other EBV-associated cancers such as EBV-positive BL<sup>162</sup>, and why germline homozygosity represents a common feature of DLBCL, a largely non-virus-associated B-cell lymphoma<sup>183</sup>. One explanation may be that BL has a more restricted expression of viral latency antigens compared to cHL<sup>33</sup>. In DLBCL, the high rate of germline HLA-I homozygosity (26%, compared to 28% in HL and 23% in normal) was thought to contribute to limit neoantigen repertoire presentation, given the substantial nonsynonymous mutation burden typical of this disease, including ASHM<sup>162</sup>. Although the mutational burden of EBV-negative cHL may appear higher than DLBCL overall<sup>129</sup>, the phenotypic and molecular heterogeneity of the latter warrants further analyses focused on individual subtypes in larger number of cases. Future work should also verify how germline HLA-I zygosity can predispose to the development of EBV-positive cHL.

Analysis of ICI clinical trials reveals that virus-positive status could represent a positive biomarker for ICI therapy response in GC and HNSCC. The improved response to immunotherapy of EBV-positive GC patients compared to EBV-negative GC patients is hypothesized to be due to increased expression of *PD-L1*, potentially through activation of the NF- $\kappa$ B pathway by viral protein LMP2A<sup>184</sup>. This is consistent with the association between *PD-L1* expression and EBV-positive status in TCGA's study of GC, as well as other studies that reported similar results in GC tumors<sup>169</sup>. The association between HPV infection and *PD-L1* expression is less clear: some studies report a link between HPV status and *PD-L1* expression<sup>185,186</sup>, while others find no association<sup>187,188</sup>, the latter of which is consistent with the results from the TCGA HNSCC dataset. It has been hypothesized that the improved response of HPV-positive HNSCC tumors to ICI therapies may be due to increased abundance of tumor infiltrating lymphocytes and CD8+ T cells in the microenvironment of virus-positive tumors<sup>189</sup>.

Our integrative analysis of the epidemiological and genetic factors related to virus-associated cancers highlights two approaches to oncogenesis, in the presence and absence of viral infection. In the absence of viral infection, a normal cell acquires somatic drivers towards malignant transformation through random mutations with age, defective DNA repair, exogenous carcinogens, and interactions with the microbiome, together with selection. Following the acquisition of an average of 5-7 driver mutations<sup>190</sup>, the normal cell transforms into a cancer cell (**Figure 7C**). In virus-positive cancers, a normal cell is first infected with a virus, potentially as a result of inherited or environmental risk factors. The infected cell acquires somatic mutations over time, though fewer are generally required compared to the non-viral scenario due to the activities of viral oncoproteins. Finally, after acquiring the requisite number of drivers, the infected cell transforms into a cancer cell, and continues to follow a trajectory of progression distinct from the non-viral scenario (**Figure 7D**). Further studies will be needed in order to understand how differences in the development and progression of tumors due to viral infection following this model may be incorporated into the development of targeted therapies.

## Acknowledgements

This work was funded by the National Institutes of Health, National Cancer Institute grants R35CA253126 (R.R.), Fondazione AIRC (Investigator Grant no. 23732 to ET) and SU2C Convergence Program (K.G., Y.N., J.B.R., and R.R.).

### **Author Contributions**

Conceptualization, K.G., E.T., R.R.; Methodology, K.G., R.R.; Investigation, K.G., G.S., Y.N., J.R., C.K., M.A.; Formal Analysis, K.G., Y.N., J.R.; Provision of critical samples: C.v.N., B.F.; Writing – Original Draft, K.G.; Writing – Review & Editing, K.G., L.P., E.T., R.R.; Resources, G.S., G.P., A.C., E.T., R.R.; Supervision, E.T., R.R.

### **Declaration of Interests**

R. Rabadan is the founder of Genotwin, member of the advisory board of Diotech and consults for Arquimea Research. None of these activities are related to the results in the current manuscript.

## Figure Legends

**Figure 1:** Epidemiological trends of virus-associated cancers. A) Incidence rates of virus-associated and non-virus-associated cancers (left) and virus-positive and virus-negative tumors in virus-associated cancers (right) in males compared to females (M/F) reported in selected published studies. Each point corresponds to an incidence ratio reported in a published study in Table S2. Virus-associated cancers: ANKL, aggressive NK-cell leukemia (n=1 study); GC, gastric cancer (n=2); HCC, hepatocellular carcinoma (n=6), HL, Hodgkin lymphoma (n=2); HNSCC, head and neck squamous cell carcinoma (n=4), MCC, Merkel cell carcinoma (n=3); NKTCL, Natural killer/T-cell lymphoma (n=2); NPC, nasopharyngeal carcinoma (n=6); PBL, plasmablastic lymphoma (n=1); PCNSL, primary central nervous system lymphoma (n=1). Non-virus-associated cancers (n=1 each): ALL, acute lymphoblastic leukemia; BCC, basal cell carcinoma; CLL, chronic lymphocytic leukemia. Virus-positive tumors: BL, Burkitt lymphoma (n=4); GC (n=33); HCC (n=3); HL (n=6); HNSCC (n=1); KS, Kaposi sarcoma (n=15); MCC (n=2). Virus-negative tumors: BL (n=3); GC (n=31); HL (n=6); MCC (n=2). B) Estimated incidence rates of EBV-positive HL (left) and EBV-negative HL (right) by country. C) Estimated incidence rates of EBV-positive NPC (left) and EBV-negative NPC (right) by country.

**Figure 2:** Mutation burden of virus-positive and virus-negative tumors in 9 cancers. A) Ratio of average number of somatic nonsynonymous mutations in virus-negative tumors compared to virus-positive tumors. MCC (n=71), HNSCC (n=487), CC (n=172), cHL (n=54), GC (n=436), BL (n=91; 68 EBV-positive eBL, 6 EBV-negative eBL, 3 EBV-positive sBL, 14 EBV-negative sBL), PBL (n=51), HCC (n=190), and PCNSL (n=58). B) Counts of somatic nonsynonymous mutations in virus-positive and virus-negative tumors in the same cancers. C) Summary of trends in mutation load in virus-positive versus virus-negative tumors by cancer type. Results highlighted in orange and dark blue reach significance past a threshold  $p < 0.05$ , while results highlighted in light blue indicate a trend that does not reach significance  $p < 0.05$  (MWU test).

**Figure 3:** Genetic lesions in EBV-positive and EBV-negative cHL sequenced by WES. A) Genomic landscape of cHL (n=56). Clonal mutations in genes mutated in at least four patients and known to be implicated in cHL pathogenesis, as well as significant copy number peaks from GISTIC, are shown. Mutations in HLA-I genes were obtained from PolySolver, while other mutations were obtained from SAVI +/- Sanger sequencing. ^chromosomal copy number alteration; \*arm-level copy number alteration. ASHM: at least one mutation in an aberrant somatic hypermutation target region. JAK-STAT: at least one mutation in STAT6, SOCS1, CSF2RB, and/or CNA in 9p24.1. PI3K-MAPK: at least one mutation in GNA13, ITPKB. NF- $\kappa$ B: at least one mutation in NFKBIE, TNFAIP3 and/or CNA in 6q23.3, 2p16.1. p value: Fisher's exact test B) Counts of patients with STAT6 nonsilent mutations in EBV- (n=41) and EBV+ (n=15) cHL. P value: Fisher's exact test. C) Nonsilent mutations in STAT6 observed in 56 cHL patients. D) Counts of patients with GNA13 nonsilent mutations in EBV- (n=41) and EBV+ (n=33) cHL. P value: Fisher's exact test. E) Nonsilent mutations in GNA13 observed in 56 cHL patients. F) Recurrent copy number gains in cHL, identified by GISTIC (n=56). G) Recurrent copy number losses in cHL, identified by GISTIC (n=56).

**Figure 4:** Mutations signatures in eight virus-associated cancers: A) cHL (n=32), B) MCC (n=71), C) GC (n=436), D) CC (n=172), E) HCC (n=190), F) HNSCC (n=487), G) BL (n=91; 68 EBV-positive eBL, 6 EBV-negative eBL, 3 EBV-positive sBL, 14 EBV-negative sBL), H) PBL (n=23). Activities of signatures in virus-positive compared to virus-negative cases are shown for signatures with a significant difference in activity ( $q < 0.05$ ) and/or biologically relevant trend (right). Schematic representation of the effect of the absence of processes behind key mutation

signatures in virus-associated cases is shown in A) cHL (EBV-positive) and B) MCC (MCPyV-positive).

**Figure 5:** Somatic mutations in *EIF4A1* and *DDX3X* are recurrent genetic lesions associated with virus-positive status. A) Combined odds ratio of mutation in genes associated with virus-positive (top) and virus-negative (bottom) status ( $q < 0.05$ ) from pooled data of 1,658 tumors from 9 virus-associated cancers. \* $q < 0.05$ , Fisher's exact test, BH corrected. B) Mutations in *DDX3X* and *EIF4A1* in 1,974 tumors. \* $p < 0.05$ , binomial test. C) Fraction of patients that are male by *DDX3X* mutation status. D) *DDX3X* expression by *DDX3X* mutation status and sex in Burkitt lymphoma ( $n=117$ ). \* $p < 0.05$ , MWU test. E) Frequencies of mutation of *DDX3X* and *EIF4A1* in virus-positive tumors overall and summary of key biological functions.

**Figure 6:** Germline and somatic status of HLA-I in EBV-negative and EBV-positive cHL. A) Percent of germline homozygous individuals in HLA-I in seven virus-associated cancers by virus-infection status (positive versus negative). \* $p < 0.05$ , binomial test. B) Distribution of age of cHL diagnosis in UK BioBank cHL patients that were germline heterozygous in HLA-I ( $n=406$ ) versus germline homozygous in all three HLA-I genes ( $n=20$ ). C) Percent of patients with the HLA-A\*02\*01 allele by virus status ( $n=56$ ). P value: Fisher's exact test. D) Count of nonsynonymous mutations in HLA-I genes in cHL by virus status ( $n=56$ ). P value: MWU test. E) Percent of patients with loss of heterozygosity of HLA-I by virus status ( $n=18$ ). P value: Fisher's exact test.

**Figure 7:** Analysis of immunotherapy trials in virus-associated cancers. A) Odds ratio of positive response to treatment with ICIs with virus-positive status, PD-L1 positive status, and/or high tumor mutation burden (TMB) in 37 studies representing four types of cancer. B) Expression of PD-L1 (CD274) versus viral status of tumors in TCGA studies of GC (TCGA-STAD), HCC (TCGA-LIHC), and HNSCC (TCGA-HNSC). \* $p < 0.05$ , MWU test. C) Model for oncogenesis in the absence of viral infection. A normal cell accumulates driver mutations as a result of age, defective DNA repair, exogenous carcinogens, or microbiome interactions, leading under selective pressure to initiation, promotion, and progression that ends in the malignant transformation of the cell. D) Model for oncogenesis in the presence of viral infection. A normal cell is infected with a virus and a latent infection is established as a result of inadequate host immune response, potentially associated with germline MHC dysfunction or other inherited risk factors. The infected normal cell acquires somatic mutations in specific genes, such as chromatin modifiers like *ARID1A* or RNA helicases *DDX3X* and *EIF4A1*, leading to initiation, promotion, and progression that ends in the malignant transformation of the infected cell.

## STAR Methods

### RESOURCE AVAILABILITY

#### Lead contact

Further information and requests for resources should be directed to and will be fulfilled by the Lead Contact, Raul Rabadan ([rr2579@cumc.columbia.edu](mailto:rr2579@cumc.columbia.edu)).

#### Materials availability

This study did not generate new unique reagents.

#### Data and code availability

- DNA sequencing data of Hodgkin lymphoma and Kaposi sarcoma samples will be deposited in the database of Genotypes and Phenotypes (dbGaP) and available upon publication.
- This paper does not report original code.



- Any additional information required to reanalyze the data reported in this paper is available from the lead contact upon request.

## EXPERIMENTAL MODEL AND SUBJECT DETAILS

### Overview

Clinical and genomic data of 1,974 cancer patients was obtained from 14 published studies<sup>129-131,133-137,141,149,156-159</sup> (1,963 patients) and newly collected DNA sequencing data of Hodgkin lymphoma (32 patients) and Kaposi sarcoma (10 patients). The combined cohort consists of 612 females, 903 males, and 356 individuals of unknown or unreported sex. The ages range from 1 year to 90 years. IDs of the newly sequenced samples are anonymized. Detailed information is provided in **Table S1**.

### Hodgkin lymphoma

32 Hodgkin lymphoma cases were newly analyzed at the University of Perugia, Italy, as further detailed below. Additional information is provided in **Table S1**.

### Kaposi sarcoma

10 Kaposi sarcoma patients were enrolled for study at the University of Sassari, Italy. Skin lesion tumor samples and adjacent non-neoplastic cells were surgically resected for sequencing. All biological samples (tissue and blood specimens) were obtained after the written consent from the patients. The study was approved by the Committee for the Ethics of the Research and Bioethics of the National Research Council (CNR n.12629). Additional information is provided in **Table S1**.

## METHOD DETAILS

### Epidemiological Analysis

Sex ratio in incidence rates of virus-associated and non-virus associated cancers, as well as virus-positive and virus-negative cases of virus-associated cancers, were obtained from studies listed in **Table S2**<sup>40-121</sup>. Global age-standardized incidence rates of cancers by country in 2020 were obtained from GLOBOCAN 2020 Cancer Today online portal (<https://gco.iarc.fr/today/home>). Attributable fraction of cancer cases for each region were obtained from de Martel et al<sup>3</sup>.

### Sample preparation and sequencing

#### *Hodgkin lymphoma*

Whole-genome sequencing (WGS) was performed on tumor and normal samples from a cohort of 27 cHL cases previously subjected to whole-exome sequencing (WES)<sup>128</sup>, as well as from 5 newly microdissected EBV+ cHL cases, under an IRB-approved protocol after written informed consent<sup>128</sup>. For each patient, we laser-microdissected HRS cells (n=1200-1800 per case) along with a similar number of adjacent nonneoplastic cells from frozen lymph node sections and subjected the samples to whole genome amplification (WGA) in duplicate. Here, whole genome sequencing (WGS) was performed separately for each tumor duplicate at a median depth of 44X, as well as for the pooled normal duplicates to a median depth of 44X (**Table S4**). For 5 cases previously subjected to WES<sup>128</sup>, we additionally sequenced the whole genome of unamplified DNA from peripheral blood at a median depth of 41X. Preparation of libraries for WGS was done using Illumina TruSeq DNA PCR-Free library kit and Illumina TruSeq Nano DNA library kit for 31/32 cases and 1/32 case respectively, followed by paired-end sequencing for 2x125 cycles on Illumina HiSeq 2500 and for 2x150 cycles on Illumina NovaSeq instruments for 20/32 cases and 12/32 cases, respectively.

### Virus infection status calling

EBV infection status of cHL patients was determined by standard EBER in-situ hybridization on fixed tissue sections and/or confirmed presence of reads aligned to the EBV reference assessed by samtools idxstats. Virus-infection status of patients in other cohorts were reported in the original studies<sup>38,128-130,132,135-137,156-159</sup> or obtained via cBioportal (<https://www.cbioportal.org/>) for TCGA cervical<sup>133</sup>, gastric<sup>131</sup>, and head and neck squamous cell carcinoma<sup>134</sup> data sets.

#### Single nucleotide and indel variant calling pipeline

##### *Hodgkin lymphoma*

Whole genome sequencing samples were aligned to GRCh37 using the Burrows-Wheeler aligner. Samples were pre-processed by indel realignment, duplicate removal, and base recalibration with GATK<sup>191</sup> following the GATK best practices workflow<sup>192</sup>. SAVI-v2<sup>193</sup>, an in-house variant caller, was used to call somatic variants. As there were two microdissected tumor and one normal sample for each case sequenced by WGS, we adapted our previously described WES pipeline<sup>128</sup> for one normal microdissected sample rather than two by defining somatic variants present in a major tumor clone as those having a VAF  $\geq$  20% in both tumor replicates,  $<$ 3% in the pooled normal microdissected sample, and  $<$ 1% in the unamplified blood sample (when available) at any genome bases that were covered by at least 6 reads in all tumor, normal and blood samples of each case (representing a median of 89% of all genome bases, IQR 87-90%). The threshold of 6 reads was selected because, in a comparison to deeper WES data from the same cases ( $n=31$  with at least 1 mutation called on both WES and WGS) taken as benchmark (median coverage 148X), this threshold provided absolute specificity (99.999%) while preventing the loss of sensitivity at minimum depths higher than 6 (**Figure S12**). All other filters, including those to remove SNPs, strand bias, and homopolymeric indels, were applied as previously described<sup>128</sup>. To further account for errors in the whole genome sequencing data, we removed variants within ENCODE or Duke consensus blacklist regions (<http://genome.ucsc.edu/cgi-bin/hgFileUi?db=hg19&g=wgEncodeMapability>), as those are suspected artifacts. Finally, we used normal samples from all 32 WGS cases to construct a cohort supernormal and removed any putative somatic variants in these cases that was called also in the supernormal.

WES data were analyzed for 38 cHL cases of ours (34 already published plus 4 newly microdissected and processed as in ref.<sup>128</sup>, except for using the updated Agilent SureSelectXT V6+Cosmic probes and kit), following a bioinformatics pipeline previously described<sup>128</sup> that was also applied to the WES data of 18 cHL cases available for download from ref.<sup>129</sup>. The latter data were generated after flow cytometry sorting of tumor and normal cells from cryopreserved tissue cell suspensions, without subsequent WGA, and comprised one tumor and one normal sample per case. These 56 WES samples were subjected to the same bioinformatics pipelines for mutation calling (described in ref.<sup>128</sup>) and for copy number aberration calling and HLA-I analyses (described further below). Two cases (patient IDs c\_cHL\_4 and c\_cHL\_24) were excluded from mutation load comparison due to previously described microsatellite instability<sup>129</sup>.

##### *Kaposi sarcoma*

WES data from 10 samples were aligned to GRCh37 using the Burrows-Wheeler aligner. Samples were pre-processed by indel realignment, duplicate removal, and base recalibration with GATK following the GATK best practices workflow. SAVI-v2<sup>193</sup> was used to call somatic variants. The variant list was filtered for variants with a minimum total depth 10 and maximum total depth 700 in both tumor and normal, strand bias p value  $>$  0.001 in tumor and normal, and called as significant somatic variants by SAVI (p-value  $<$ 0.05, and confidence interval for the significance of the tumor/normal comparison  $>$ 0). Variants were excluded if they were found in an in-house supernormal created from 186 normal samples from the TCGA, if

they were in the cohort supernormal constructed from variants in the ten normal samples, or if they were common SNPs found at a frequency  $\geq 5\%$  in the 1000 Genomes Project.

#### Mutation load analysis

The mutations in each tumor were obtained from the variant lists reported in the original studies (for previously published cases<sup>129-131,133-137,141,149,156-159</sup>), or from the mutation calling pipeline described above (for newly sequenced Hodgkin and Kaposi sarcoma cases). Mutations in driver genes were defined as mutations that occurred within genes described as cancer-specific drivers and/or recurrently mutated genes in the original studies<sup>129-131,133-137,141,149,156-159</sup>. Aberrant somatic hypermutation (ASH) mutations were defined as mutations occurring in as regions within 2 kb of the transcription start site of 126 previously identified targets of ASHM [75, 126, 127], as previously described [33]. ASH mutations per Mb were calculated by dividing the number of mutations by the total length of the candidate regions (0.252 Mb).

#### Mutation signature analysis

Mutation signatures were called from somatic variants separately for each cancer type using Palimpsest<sup>194</sup>, an NMF-based mutation signature caller. Signatures were obtained from somatic variants called from whole genome sequencing data when available (cHL, Burkitt) or whole exome sequencing data (other cancers). First, unsupervised mutation signature analysis was run for single base substitution (SBS), double base substitution (DBS), and insertion-deletion (ID) signature calling (when applicable) for all variants in all patients of a given tumor type. The similarity between de novo inferred signatures and published mutation signatures from COSMIC v3 was assessed by cosine similarity function in Palimpsest. Supervised mutation signature analysis was then run separately for each cancer type with mutation signatures that were the highest ranking match for the inferred signature from the unsupervised analysis.

Mutation signature calling in cHL samples followed the methods above with the addition of a filter for clonal variants only (Tumor VAF  $\geq 20\%$  in both replicates) to account for noise in whole genome amplified samples. Additionally, to improve detection of potential AID-associated signatures expected in this data set due to the germinal center B cell of origin of this tumor, de novo signatures were also separately called for clustered variants, i.e. variants grouped by nearest mutation distance (NMD) below a threshold defined according to approach of ref.<sup>195</sup>, i.e. NMD < 316 bases for WGS based on visual inspection of the histogram of NMD (**Figure S13**). All de novo signatures found in cHL cases were compared to published whole genome amplification signatures<sup>196</sup> to rule out sequencing artifacts from the amplification procedure. All other steps of the mutation signature analysis were performed as described above.

#### Copy number segmentation and variant calling

Copy number segmentation of cHL samples was conducted using Control-FREEC<sup>197</sup> for each pair(s) of tumor and normal samples sequenced by whole genome sequencing available for each case. For patients with more than one tumor and/or normal sample, only aberrations occurring in overlapping regions of gain or loss present in both tumor replicates and in neither normal sample were counted as non-normal copy number. Copy number aberrations were defined based on the following absolute CN cut off values: CN > 2.3 gain, CN > 3.6 amplification, CN < 1.7 heterozygous loss, and CN < 0.8 homozygous loss. The CN of overlapping regions of CNA was calculated as the mean of the constituent copy numbers. When compared to fluorescence in situ hybridization data already available for JAK2 and TNFAIP3 deletion in 33/34 and 32/34 previously published cases, sensitivity and specificity of this analysis for focal JAK2 gain and TNFAIP3 loss on WGS cases were 38% and 94% for JAK2 copy number gain, and 29% and 81% for TNFAIP3 deletion (**Table S6**).

Copy number segmentation of Kaposi sarcoma samples was conducted using Sequenza<sup>198</sup> for each pair of tumor or normal samples sequenced by whole exome sequencing

for each case. Copy number segmentation of plasmablastic lymphoma samples was performed with Oncoscan, as previously described<sup>130</sup>. Copy number segmentation data of other cancers was obtained from the original published studies (Burkitt<sup>149</sup>, NKTCL<sup>158</sup>) or cBioportal (TCGA samples<sup>131-134</sup>).

## GISTIC Analysis

### *Hodgkin lymphoma*

In order to define significant regions of recurrent CNAs in Hodgkin lymphoma, GISTIC 2.0<sup>199</sup> was applied to the copy number segmentation of 56 cases of cHL sequenced by WES with a  $q < 0.2$ , a maximum segmentation threshold of 10,000, and all other parameters default via the GenePattern server (<https://www.genepattern.org/>). To denoise the list of putative recurrent CNAs in the WES cases, GISTIC 2.0 was applied to the cohort of 32 cases of cHL sequenced by WGS, with a  $q < 0.5$ , a maximum segmentation threshold of 10,000, and all other parameters default via the GenePattern server. The list of putative CNA regions defined by WES was filtered to include only those peaks occurring on the same cytoband as a peak called in the WGS cohort, and/or in a region previously described as a known site of recurrent copy number aberration in B cell lymphomas by manual curation. Significant peaks were defined as those having a  $q^* < 1e-04$ , with  $q^* = \sqrt{q_{WES} * q_{WGS}}$ ,  $q_{WES}$  is the  $q$  value of the peak in the cytoband called by GISTIC in the WES cohort and  $q_{WGS}$  is the  $q$  value of the peak in the cytoband called by GISTIC in the WGS cohort. GISTIC peaks of gain or amplification were counted as present in a patient if the maximum inferred tumor copy number within the wide peak limit region was  $> 2.3$  (gain) or  $> 3.6$  (amplification). GISTIC peaks of deletion were counted as present in a patient if the minimum inferred tumor copy number within the wide peak limit region was  $< 1.7$  (heterozygous loss) or  $< 0.8$  (homozygous loss). Arm and whole-chromosome level CNAs were defined as lesions of the same type (i.e. gain or loss) that covered  $>75\%$  of the chromosome arm or chromosome, respectively.

### *Pan-cancer*

In order to define significant regions of recurrent CNAs across virus-associated cancers, GISTIC 2.0<sup>199</sup> was applied to pooled copy number segmentation data of 1,557 tumors, using a significance threshold of  $q = 0.1$ , a maximum segmentation threshold of 10,000, and all other parameters default via the GenePattern server (<https://www.genepattern.org/>) (**Table S10**). GISTIC peaks of gain or amplification were counted as present in a patient if the maximum inferred tumor copy number within the wide peak limit region was  $> 2.3$  (gain) or  $> 3.6$  (amplification). GISTIC peaks of deletion were counted as present in a patient if the minimum inferred tumor copy number within the wide peak limit region was  $< 1.7$  (heterozygous loss) or  $< 0.8$  (homozygous loss). Arm and whole-chromosome level CNAs were defined as lesions of the same type (i.e. gain or loss) that covered  $>75\%$  of the chromosome arm or chromosome, respectively.

## Analysis of Recurrently Mutated Genes in Virus-associated Cancers

Nonsynonymous mutations in protein-coding genes were counted in 1,658 patients with DNA sequencing data. For patients with both WES and WGS available, WES was used due to greater depth of sequencing. Hodgkin lymphoma cases were filtered to include only clonal mutations ( $Tfreq \geq 20$ ; in both tumor samples when applicable) to account for noise in cases that had undergone whole genome amplification. Cases of MCC and PCNSL were only counted in the statistics for genes which were included in those targeted panels. To eliminate noise from hypermutated samples, for all cancers, only cases with  $<300$  mutations were included. Significant genes were defined as those with an odds ratio (OR) of mutation in virus positive versus negative  $>1$  and BH corrected  $p$  value  $<0.05$  and recurrently mutated in at least two cases in at least two unique cancer types. Significant copy number alterations were defined as



those identified from the pan-cancer GISTIC analysis (see section “GISTIC analysis” above) with an odds ratio (OR) of mutation in virus positive versus negative  $>1$  and BH corrected p value  $<0.0001$ .

### GNA13 sequencing

A two-round DNA PCR amplification was performed for GNA13 coding exons (fully nested for exons 1, 2 and 4; seminested for exon 3) in 18 additional EBV+ cHL cases identified in the Perugia and Amsterdam hematopathology archives. For each sample, at least 50 tumor cells were microdissected (along with a comparable number of non-tumor cells) from frozen lymph node sections stained with hematoxylin and eosin, or with immunohistochemistry for CD30. Cell microdissection was performed with a Palm/Olympus laser microdissector as described in ref.<sup>128</sup>. Microdissected cells were then lysed at 95°C for 10 minutes in PCR buffer, and PCR products were gel-purified and directly Sanger-sequenced. PCR primers and amplification conditions are available upon request.

### HLA Analysis

#### *Molecular Data Sets*

Class I HLA allele typing of DNA sequencing samples (56/56 cHL<sup>141</sup>, 10 newly sequenced Kaposi sarcoma, 83 BL<sup>149</sup>) was performed using PolySolver with default parameters. Class I HLA allele typing of 4 additional previously published Kaposi sarcoma samples<sup>200</sup> and all NKTCL samples<sup>158</sup> from RNA sequencing was performed using arcasHLA<sup>201</sup> with default parameters. Class I HLA typing of TCGA data sets from RNA-seq was obtained from a previous study<sup>202</sup>. We counted as “homozygous” those cases where both inferred alleles of an HLA-I gene are the same to the two-field resolution (allele group and specific HLA protein). For cHL cases with multiple tumor and normal samples from the same patient (38/56 patients), alleles were called from sequenced unamplified blood samples when available. Otherwise, cases were called as homozygous only if they were called as homozygous by PolySolver in all tumor and normal samples. HLA somatic mutation calling in tumor samples was performed using PolySolver against matched normal samples. Somatic HLA loss of heterozygosity, which was feasible only in non-whole genome amplified cases (n=18), was assessed with LOHHLA with a minimum coverage threshold of 5 reads using purity and ploidy inferred by Sequenza<sup>198</sup> with default parameters. Cases were called as having somatic HLA loss of heterozygosity if the p value for loss of the allele was  $< 0.01$  and the inferred copy number of the allele was  $< 0.5$ , following thresholds used in McGranahan et al<sup>203</sup>. HLA loss of heterozygosity was evaluated only for patients that did not undergo whole genome amplification because allele dropout from the amplification procedure prevented accurate HLA-I loci allelic copy number calling in those samples.

#### *UK BioBank*

Imputed HLA-I genotypes of 488,265 patients from the UK BioBank reported by HLA\*IMP:02 were obtained as described in ref.<sup>162</sup>. UK BioBank individuals were categorized into different cancer groups by organ location/pathology according to hospital and cancer registry records using ICD10 codes. The rate of homozygosity in the general population was estimated from RNA-seq of 95 samples representing 5 tissue types in the GTEx data base, as previously described<sup>162</sup>.

### Analysis of Immunotherapy Trials

The comparative analysis of response to immunotherapy was performed using data from ClinicalTrials.gov. Eleven checkpoint inhibitors targeting either PD-1, PD-L1, or CTLA-4 were included: Ipilimumab, Nivolumab, Pembrolizumab, Cemiplimab, Atezolizumab, Avelumab, Durvalumab, Camrelizumab, Sintilimab, Toripalimab, Tremelimumab. On September 22<sup>nd</sup> 2022,

trials were collected using the following query: “((NOT NOTEXT) [CITATIONS]) AND (<ICI drug name 1> OR <ICI drug name 2> OR ...)”, where ICI drug names correspond to the ones listed above as well as any known synonyms (e.g. Ipilimumab: BMS-734016, MDX-010, MDX-101, Yervoy). Only single-arm, interventional studies where the objective response rate was available specifically for immune checkpoint therapy (with no other combination therapies) were included. Whenever possible, response stratified by virus status, PD-L1 expression and tumor mutational burden was collected. “PD-L1 positive” refers to patients that were classified as PD-L1 positive in the original study (most often,  $\geq 1\%$  tumor cells). “Tumor mutational burden (TMB) high” refers to patients classified as TMB high in the original study (with different cut-offs used depending on the study and/or tumor type).

#### QUANTIFICATION AND STATISTICAL ANALYSIS

Analyses of significance of mutation counts and frequencies were performed using a Mann-Whitney U test and two-sided Fisher’s exact test, respectively. Significance of mutation signature activities were assessed using Student’s t test. Odds ratios of mutation by virus status were computed with Haldane-Anscombe correction when applicable. The 95% confidence interval of odds ratios is reported as the normal approximation (Wald). The distribution of HLA-I germline homozygosity in HL patients in the UK BioBank was compared using a Kolmogorov-Smirnov test. Multiple hypothesis corrections were applied using the Benjamini-Hochberg Procedure and reported as q-values.

## Supplemental Information

### Document S1. Figures S1-S13:

Figure S1. Geographic distributions of Kaposi sarcoma and cervical cancer by country reported by GLOBOCAN 2020. A) Estimated age-standardized incidence rate (ASR) of Kaposi sarcoma by country. B) Estimated ASR of cervical cancer by country.

Figure S2. Percent driver mutations in virus positive vs negative tumors in nine cancers. P values from MWU test.

Figure S3. Somatic mutation burden of EBV-negative versus EBV-positive cHL sequenced by whole genome sequencing. Cases in the mixed-cellularity (MC) subtype are highlighted in red. A) Count of clonal mutations in coding regions. B) Count of clonal, nonsilent mutations in coding regions. C) Percentage of total mutations that are indel mutations per case. P values from MWU test.

Figure S4. Counts of recurrent CNV lesions in cHL. A) Count of copy gains in 56 cHL sequenced by WES. B) Count of copy deletions in 56 cHL sequenced by WES. C) Count of copy gains in 32 cHL sequenced by WGS. D) Count of copy deletions in 32 cHL sequenced by WGS. P values from MWU test.

Figure S5. Counts of mutations attributed to each mutation signature in virus-positive and virus-negative cases of five cancers. A) cHL (n=32); B) MCC (n=71); C) GC (n=436); D) HNSCC (n=487); E) BL (n=91). q values from Student's t test, BH corrected.

Figure S6. Patterns of somatic hypermutation in cHL sequenced by WGS. A) Number of ASHM-associated genes mutated in 32 cHL sequenced by WGS. B) Number of mutations in ASHM regions per ASHM-associated gene in 32 cHL sequenced by WGS. P values from MWU test.

Figure S7. Odds ratio of mutation in virus positive versus virus negative tumors by cancer type. Genes with a significant OR of mutation in virus positive tumors from the combined cohort are shown. \*  $q < 0.05$ , chi-square test, BH corrected.

Figure S8. A) Odds ratio of CNA in virus positive versus virus negative tumors in the combined cohort. B) Odds ratio of CNA in virus positive versus virus negative tumors by cancer type in regions with a significant OR of CNA in virus positive tumors from the combined cohort and the top ranking region with a significant OR of CNA in virus negative tumors from the combined cohort. \*  $q < 0.0001$ , chi-square test, BH corrected.

Figure S9. Expression of DDX3X and DDX3X mutation status in TCGA-HNSC (n=487).

Figure S11. Frequency of homozygosity in HLA-I in virus-associated cancers in the UK BioBank.

Figure S10. HLA-I gene-specific rates of germline homozygosity in 56 cHL sequenced by WES. A) Rate of germline homozygosity in HLA-A. B) Rate of germline homozygosity in HLA-B. C) Rate of germline homozygosity in HLA-C.

Figure S12. Accuracy, sensitivity, and specificity curves used to determine depth cut-off for variant calling of cHL cases sequenced by WGS.

Figure S13. Histogram of mutation count by nearest mutation distance (NMD) used to determine cut-off for cHL de novo mutation signature analysis.

Table S1. Clinical characteristics of patients in study.

Table S2. Studies included in Figure 1B (M/F incidence rates).

Table S3. Mean count of nonsynonymous mutations in virus-positive and virus-negative tumors in 9 cancers.

Table S4. Depth of sequencing of newly sequenced WGS cHL cases

Table S5. GISTIC peaks in cHL.

Table S6. Validation of JAK2 gain / TNFAIP3 loss in cHL copy number results.

Table S7. Cosine similarities of de novo mutation signatures to COSMIC mutation signatures.

Table S8. Relative and absolute activities of COSMIC mutation signatures.

Table S9. Activities of MMR signatures in gastric cancer by EBV infection status.

Table S10. GISTIC peaks in virus cohort.

Table S11. Recurrently mutated genes in virus-associated cancers compared to non-virus associated cancers (and vice versa).

Table S12. Larger Burkitt lymphoma cohort for DDX3X and EBV association analysis.

Table S13. Mutations in DDX3X and EIF4A1 in 1,974 tumors.

Table S14. HLA typing in 56 cHL.

Table S15. Nonsynonymous mutations in HLA in 56 cHL.

Table S16. Studies included in Figure 7A (biomarkers of immunotherapy response).



## References

- 1 van Elsland, D. & Neefjes, J. Bacterial infections and cancer. *EMBO Rep* **19**, e46632 (2018). <https://doi.org/10.15252/embr.201846632>
- 2 Zapatka, M. *et al.* The landscape of viral associations in human cancers. *Nat Genet* **52**, 320-330 (2020). <https://doi.org/10.1038/s41588-019-0558-9>
- 3 de Martel, C., Georges, D., Bray, F., Ferlay, J. & Clifford, G. M. Global burden of cancer attributable to infections in 2018: a worldwide incidence analysis. *Lancet Glob Health* **8**, e180-e190 (2020). [https://doi.org/10.1016/S2214-109X\(19\)30488-7](https://doi.org/10.1016/S2214-109X(19)30488-7)
- 4 Schrama, D. *et al.* Merkel cell polyomavirus status is not associated with clinical course of Merkel cell carcinoma. *J Invest Dermatol* **131**, 1631-1638 (2011). <https://doi.org/10.1038/jid.2011.115>
- 5 White, M. K., Pagano, J. S. & Khalili, K. Viruses and human cancers: a long road of discovery of molecular paradigms. *Clin Microbiol Rev* **27**, 463-481 (2014). <https://doi.org/10.1128/CMR.00124-13>
- 6 Epstein, M. A., Achong, B. G. & Barr, Y. M. Virus Particles in Cultured Lymphoblasts from Burkitt's Lymphoma. *Lancet* **1**, 702-703 (1964). [https://doi.org/10.1016/s0140-6736\(64\)91524-7](https://doi.org/10.1016/s0140-6736(64)91524-7)
- 7 Kapatai, G. & Murray, P. Contribution of the Epstein Barr virus to the molecular pathogenesis of Hodgkin lymphoma. *J Clin Pathol* **60**, 1342-1349 (2007). <https://doi.org/10.1136/jcp.2007.050146>
- 8 Castillo, J. J., Bibas, M. & Miranda, R. N. The biology and treatment of plasmablastic lymphoma. *Blood* **125**, 2323-2330 (2015). <https://doi.org/10.1182/blood-2014-10-567479>
- 9 Brandsma, D. & Bromberg, J. E. C. Primary CNS lymphoma in HIV infection. *Handb Clin Neurol* **152**, 177-186 (2018). <https://doi.org/10.1016/B978-0-444-63849-6.00014-1>
- 10 Liu, Z. *et al.* Characterization of the humoral immune response to the EBV proteome in extranodal NK/T-cell lymphoma. *Sci Rep* **11**, 23664 (2021). <https://doi.org/10.1038/s41598-021-02788-w>
- 11 Murphy, G., Pfeiffer, R., Camargo, M. C. & Rabkin, C. S. Meta-analysis shows that prevalence of Epstein-Barr virus-positive gastric cancer differs based on sex and anatomic location. *Gastroenterology* **137**, 824-833 (2009). <https://doi.org/10.1053/j.gastro.2009.05.001>
- 12 Tsao, S. W., Tsang, C. M. & Lo, K. W. Epstein-Barr virus infection and nasopharyngeal carcinoma. *Philos Trans R Soc Lond B Biol Sci* **372**, 20160270 (2017). <https://doi.org/10.1098/rstb.2016.0270>
- 13 Mundo, L. *et al.* Frequent traces of EBV infection in Hodgkin and non-Hodgkin lymphomas classified as EBV-negative by routine methods: expanding the landscape of EBV-related lymphomas. *Mod Pathol* **33**, 2407-2421 (2020). <https://doi.org/10.1038/s41379-020-0575-3>
- 14 Bosch, F. X., Lorincz, A., Muñoz, N., Meijer, C. & Shah, K. V. The causal relation between human papillomavirus and cervical cancer. *Journal of clinical pathology* **55**, 244-265 (2002).

- 15 Dong, H. *et al.* Current status of human papillomavirus-related head and neck cancer: from viral genome to patient care. *Virologica Sinica*, 1-19 (2021).
- 16 de Martel, C., Plummer, M., Vignat, J. & Franceschi, S. Worldwide burden of cancer attributable to HPV by site, country and HPV type. *Int J Cancer* **141**, 664-670 (2017). <https://doi.org/10.1002/ijc.30716>
- 17 Maucort-Boulch, D., de Martel, C., Franceschi, S. & Plummer, M. Fraction and incidence of liver cancer attributable to hepatitis B and C viruses worldwide. *Int J Cancer* **142**, 2471-2477 (2018). <https://doi.org/10.1002/ijc.31280>
- 18 Iwanaga, M., Watanabe, T. & Yamaguchi, K. Adult T-cell leukemia: a review of epidemiological evidence. *Front Microbiol* **3**, 322 (2012). <https://doi.org/10.3389/fmicb.2012.00322>
- 19 Chang, Y. *et al.* Identification of herpesvirus-like DNA sequences in AIDS-associated Kaposi's sarcoma. *Science* **266**, 1865-1869 (1994). <https://doi.org/10.1126/science.7997879>
- 20 Narkhede, M., Arora, S. & Ujjani, C. Primary effusion lymphoma: current perspectives. *Onco Targets Ther* **11**, 3747-3754 (2018). <https://doi.org/10.2147/OTT.S167392>
- 21 Calabro, M. L. & Sarid, R. Human Herpesvirus 8 and Lymphoproliferative Disorders. *Mediterr J Hematol Infect Dis* **10**, e2018061 (2018). <https://doi.org/10.4084/MJHID.2018.061>
- 22 Feng, H., Shuda, M., Chang, Y. & Moore, P. S. Clonal integration of a polyomavirus in human Merkel cell carcinoma. *Science* **319**, 1096-1100 (2008). <https://doi.org/10.1126/science.1152586>
- 23 Yang, J. F. & You, J. Merkel cell polyomavirus and associated Merkel cell carcinoma. *Tumour Virus Res* **13**, 200232 (2022). <https://doi.org/10.1016/j.tvr.2021.200232>
- 24 Leiendecker, L. *et al.* Human papillomavirus 42 drives digital papillary adenocarcinoma and elicits a germ-cell like program conserved in HPV-positive cancers. *Cancer Discov* **CD-22-0489** (2022). <https://doi.org/10.1158/2159-8290.CD-22-0489>
- 25 Poulin, D. L. & DeCaprio, J. A. Is there a role for SV40 in human cancer? *J Clin Oncol* **24**, 4356-4365 (2006). <https://doi.org/10.1200/JCO.2005.03.7101>
- 26 Siguier, M., Sellier, P. & Bergmann, J. F. BK-virus infections: a literature review. *Med Mal Infect* **42**, 181-187 (2012). <https://doi.org/10.1016/j.medmal.2012.04.011>
- 27 McLaughlin-Drubin, M. E. & Munger, K. Viruses associated with human cancer. *Biochim Biophys Acta* **1782**, 127-150 (2008). <https://doi.org/10.1016/j.bbadis.2007.12.005>
- 28 Bakkalci, D. *et al.* Risk factors for Epstein Barr virus-associated cancers: a systematic review, critical appraisal, and mapping of the epidemiological evidence. *J Glob Health* **10**, 010405 (2020). <https://doi.org/10.7189/jogh.10.010405>
- 29 Ananthakrishnan, A., Gogineni, V. & Saeian, K. Epidemiology of primary and secondary liver cancers. *Semin Intervent Radiol* **23**, 47-63 (2006). <https://doi.org/10.1055/s-2006-939841>
- 30 Byun, J. M. *et al.* Persistent HPV-16 infection leads to recurrence of high-grade cervical intraepithelial neoplasia. *Medicine (Baltimore)* **97**, e13606 (2018). <https://doi.org/10.1097/MD.00000000000013606>

- 31 Pal, A. & Kundu, R. Human Papillomavirus E6 and E7: The Cervical Cancer Hallmarks and Targets for Therapy. *Front Microbiol* **10**, 3116 (2019). <https://doi.org/10.3389/fmicb.2019.03116>
- 32 Cousins, E. & Nicholas, J. Molecular biology of human herpesvirus 8: novel functions and virus-host interactions implicated in viral pathogenesis and replication. *Recent Results Cancer Res* **193**, 227-268 (2014). [https://doi.org/10.1007/978-3-642-38965-8\\_13](https://doi.org/10.1007/978-3-642-38965-8_13)
- 33 Hammerschmidt, W. & Sugden, B. Epstein-Barr virus sustains Burkitt's lymphomas and Hodgkin's disease. *Trends Mol Med* **10**, 331-336 (2004). <https://doi.org/10.1016/j.molmed.2004.05.006>
- 34 Chesson, H. W., Dunne, E. F., Hariri, S. & Markowitz, L. E. The estimated lifetime probability of acquiring human papillomavirus in the United States. *Sex Transm Dis* **41**, 660-664 (2014). <https://doi.org/10.1097/OLQ.0000000000000193>
- 35 Amber, K., McLeod, M. P. & Nouri, K. The Merkel cell polyomavirus and its involvement in Merkel cell carcinoma. *Dermatol Surg* **39**, 232-238 (2013). <https://doi.org/10.1111/dsu.12079>
- 36 Jarrett, A., Armstrong, A. & Alexander, E. Epidemiology of EBV and Hodgkin's lymphoma. *Annals of oncology* **7**, S5-S10 (1996).
- 37 Vockerodt, M., Cader, F. Z., Shannon-Lowe, C. & Murray, P. Epstein-Barr virus and the origin of Hodgkin lymphoma. *Chin J Cancer* **33**, 591-597 (2014). <https://doi.org/10.5732/cjc.014.10193>
- 38 Grande, B. M. *et al.* Genome-wide discovery of somatic coding and noncoding mutations in pediatric endemic and sporadic Burkitt lymphoma. *Blood* **133**, 1313-1324 (2019). <https://doi.org/10.1182/blood-2018-09-871418>
- 39 Sung, H. *et al.* Global Cancer Statistics 2020: GLOBOCAN Estimates of Incidence and Mortality Worldwide for 36 Cancers in 185 Countries. *CA Cancer J Clin* **71**, 209-249 (2021). <https://doi.org/10.3322/caac.21660>
- 40 Abdulmir, A., Hafidh, R., Abdulmuhamen, N., Abubakar, F. & Abbas, K. The distinctive profile of risk factors of nasopharyngeal carcinoma in comparison with other head and neck cancer types. *BMC public health* **8**, 1-16 (2008).
- 41 Adham, M. *et al.* Nasopharyngeal carcinoma in Indonesia: epidemiology, incidence, signs, and symptoms at presentation. *Chinese journal of cancer* **31**, 185 (2012).
- 42 Agelli, M. & Clegg, L. X. Epidemiology of primary Merkel cell carcinoma in the United States. *Journal of the American Academy of Dermatology* **49**, 832-841 (2003).
- 43 Ajila, V., Shetty, H., Babu, S., Shetty, V. & Hegde, S. Human papilloma virus associated squamous cell carcinoma of the head and neck. *Journal of sexually transmitted diseases* **2015**, 791024 (2015).
- 44 Aka, P. *et al.* Incidence and trends in Burkitt lymphoma in northern Tanzania from 2000 to 2009. *Pediatric blood & cancer* **59**, 1234-1238 (2012).
- 45 Akhtar, S., Oza, K. K. & Wright, J. Merkel cell carcinoma: report of 10 cases and review of the literature. *Journal of the American Academy of Dermatology* **43**, 755-767 (2000).
- 46 Alipov, G. *et al.* Epstein-Barr virus-associated gastric carcinoma in Kazakhstan. *World Journal of Gastroenterology* **11**, 27 (2005).

- 47 Andres, C., Belloni, B., Puchta, U., Sander, C. A. & Flaig, M. J. Prevalence of MCPyV in Merkel cell carcinoma and non-MCC tumors. *Journal of cutaneous pathology* **37**, 28-34 (2010).
- 48 Bassig, B. A. *et al.* Subtype-specific incidence rates of lymphoid malignancies in Hong Kong compared to the United States, 2001-2010. *Cancer Epidemiology* **42**, 15-23 (2016).
- 49 Bosch, F. X., Ribes, J., Cléries, R. & Díaz, M. Epidemiology of hepatocellular carcinoma. *Clinics in liver disease* **9**, 191-211 (2005).
- 50 Carrascal, E. *et al.* Epstein-Barr virus-associated gastric carcinoma in Cali, Colombia. *Oncology reports* **10**, 1059-1062 (2003).
- 51 Castillo, J. J., Bibas, M. & Miranda, R. N. The biology and treatment of plasmablastic lymphoma. *Blood, The Journal of the American Society of Hematology* **125**, 2323-2330 (2015).
- 52 Chang, M.-H. *et al.* Hepatitis B vaccination and hepatocellular carcinoma rates in boys and girls. *Jama* **284**, 3040-3042 (2000).
- 53 Chang, M. S., Lee, H. S., Kim, C. W., Kim, Y. I. & Kim, W. H. Clinicopathologic characteristics of Epstein-Barr virus-incorporated gastric cancers in Korea. *Pathology-Research and Practice* **197**, 395-400 (2001).
- 54 Chen, W. *et al.* Esophageal cancer incidence and mortality in China, 2009. *Journal of thoracic disease* **5**, 19 (2013).
- 55 Chong, J. M. *et al.* Expression of CD44 variants in gastric carcinoma with or without Epstein-Barr virus. *International journal of cancer* **74**, 450-454 (1997).
- 56 Claviez, A. *et al.* Impact of latent Epstein-Barr virus infection on outcome in children and adolescents with Hodgkin's lymphoma. *Journal of clinical oncology* **23**, 4048-4056 (2005).
- 57 Conte, S. *et al.* Population-Based Study detailing cutaneous melanoma incidence and mortality trends in Canada. *Frontiers in medicine* **9**, 830254 (2022).
- 58 Corvalan, A. *et al.* Epstein-Barr virus in gastric carcinoma is associated with location in the cardia and with a diffuse histology: a study in one area of Chile. *International journal of cancer* **94**, 527-530 (2001).
- 59 Czopek, J. P. *et al.* EBV-positive gastric carcinomas in Poland. *Polish Journal of Pathology: Official Journal of the Polish Society of Pathologists* **54**, 123-128 (2003).
- 60 Deo, S. *et al.* Colorectal Cancers in Low-and Middle-Income Countries—Demographic Pattern and Clinical Profile of 970 Patients Treated at a Tertiary Care Cancer Center in India. *JCO Global Oncology* **7**, 1110-1115 (2021).
- 61 Diepstra, A. *et al.* Latent Epstein-Barr virus infection of tumor cells in classical Hodgkin's lymphoma predicts adverse outcome in older adult patients. *J Clin Oncol* **27**, 3815-3821 (2009).
- 62 Divaris, K. *et al.* Oral health and risk for head and neck squamous cell carcinoma: the Carolina Head and Neck Cancer Study. *Cancer Causes & Control* **21**, 567-575 (2010).
- 63 Enblad, G., Sandvej, K., Sundstrom, C., Pallesen, G. & Glimelius, B. Epstein-Barr virus distribution in Hodgkin's disease in an unselected Swedish population. *Acta Oncologica* **38**, 425-429 (1999).
- 64 Fedder, M. & Gonzalez, M. F. Nasopharyngeal carcinoma. Brief review. *The American journal of medicine* **79**, 365-369 (1985).



- 65 Galetsky, S. A. *et al.* Epstein-Barr-virus-associated gastric cancer in Russia. *International Journal of Cancer* **73**, 786-789 (1997).
- 66 Gulley, M. L., Pulitzer, D. R., Eagan, P. A. & Schneider, B. G. Epstein-Barr virus infection is an early event in gastric carcinogenesis and is independent of bcl-2 expression and p53 accumulation. *Human pathology* **27**, 20-27 (1996).
- 67 Hao, Z. *et al.* The Epstein-Barr virus-associated gastric carcinoma in Southern and Northern China. *Oncology reports* **9**, 1293-1298 (2002).
- 68 Harn, H.-J. *et al.* Epstein-Barr virus-associated gastric adenocarcinoma in Taiwan. *Human pathology* **26**, 267-271 (1995).
- 69 Herrera-Goepfert, R. *et al.* Epstein-Barr virus-associated gastric carcinoma: Evidence of age-dependence among a Mexican population. *World journal of gastroenterology* **11**, 6096 (2005).
- 70 Hjalgrim, H., Friborg, J. & Melbye, M. in *Human Herpesviruses: Biology, Therapy, and Immunoprophylaxis* (eds Ann Arvin *et al.*) Ch. 53, (Cambridge University Press, 2007).
- 71 Hsu, J. L. & Glaser, S. L. Epstein-Barr virus-associated malignancies: epidemiologic patterns and etiologic implications. *Critical reviews in oncology/hematology* **34**, 27-53 (2000).
- 72 Iscovich, J., Boffetta, P., Franceschi, S., Azizi, E. & Sarid, R. Classic Kaposi sarcoma: epidemiology and risk factors. *Cancer* **88**, 500-517 (2000).
- 73 Jarrett, R. *et al.* The Scotland and Newcastle epidemiological study of Hodgkin's disease: impact of histopathological review and EBV status on incidence estimates. *Journal of clinical pathology* **56**, 811-816 (2003).
- 74 Johansson, S. L. & Cohen, S. M. Epidemiology and etiology of bladder cancer. *Seminars in surgical oncology* **13**, 291-298 (1997).
- 75 Kang, G. H. *et al.* Epstein-barr virus-positive gastric carcinoma demonstrates frequent aberrant methylation of multiple genes and constitutes CpG island methylator phenotype-positive gastric carcinoma. *The American journal of pathology* **160**, 787-794 (2002).
- 76 Karim, N. & Pallesen, G. Epstein-Barr virus (EBV) and gastric carcinoma in Malaysian patients. *The Malaysian journal of pathology* **25**, 45-47 (2003).
- 77 Kassem, A. *et al.* Frequent detection of Merkel cell polyomavirus in human Merkel cell carcinomas and identification of a unique deletion in the VP1 gene. *Cancer research* **68**, 5009-5013 (2008).
- 78 Keegan, T. H. *et al.* Epstein-Barr virus as a marker of survival after Hodgkin's lymphoma: a population-based study. *Journal of Clinical Oncology* **23**, 7604-7613 (2005).
- 79 Koriyama, C. *et al.* Epstein-Barr virus-associated gastric carcinoma in Japanese Brazilians and non-Japanese Brazilians in Sao Paulo. *Japanese journal of cancer research* **92**, 911-917 (2001).
- 80 Kume, T. *et al.* Low rate of apoptosis and overexpression of bcl-2 in Epstein-Barr virus-associated gastric carcinoma. *Histopathology* **34**, 502-509 (1999).
- 81 Lopes, L. *et al.* Epstein-Barr virus infection and gastric carcinoma in São Paulo State, Brazil. *Brazilian Journal of Medical and Biological Research* **37**, 1707-1712 (2004).

- 82 Lu, S. N. *et al.* Secular trends and geographic variations of hepatitis B virus and hepatitis C virus-associated hepatocellular carcinoma in Taiwan. *International journal of cancer* **119**, 1946-1952 (2006).
- 83 Mbulaiteye, S. M. *et al.* Trimodal age-specific incidence patterns for Burkitt lymphoma in the United States, 1973–2005. *International journal of cancer* **126**, 1732-1739 (2010).
- 84 McGlynn, K. A. & London, W. T. Epidemiology and natural history of hepatocellular carcinoma. *Best practice & research Clinical gastroenterology* **19**, 3-23 (2005).
- 85 McNeil, D. E., Coté, T. R., Clegg, L. & Mauer, A. SEER update of incidence and trends in pediatric malignancies: acute lymphoblastic leukemia. *Medical and pediatric oncology* **39**, 554-557 (2002).
- 86 Mimi, C. Y. & Yuan, J.-M. Epidemiology of nasopharyngeal carcinoma. *Seminars in cancer biology* **12**, 421-429 (2002).
- 87 Molica, S. Sex differences in incidence and outcome of chronic lymphocytic leukemia patients. *Leukemia & lymphoma* **47**, 1477-1480 (2006).
- 88 Moritani, S., Kushima, R., Sugihara, H. & Hattori, T. Phenotypic characteristics of Epstein-Barr-virus-associated gastric carcinomas. *Journal of cancer research and clinical oncology* **122**, 750-756 (1996).
- 89 Murphy, G., Pfeiffer, R., Camargo, M. C. & Rabkin, C. S. Meta-analysis shows that prevalence of Epstein–Barr virus-positive gastric cancer differs based on sex and anatomic location. *Gastroenterology* **137**, 824-833 (2009).
- 90 Nogueira, C. *et al.* Prevalence and characteristics of Epstein–Barr virus-associated gastric carcinomas in Portugal. *Infectious agents and cancer* **12**, 1-8 (2017).
- 91 Ogwang, M. D., Bhatia, K., Biggar, R. J. & Mbulaiteye, S. M. Incidence and geographic distribution of endemic Burkitt lymphoma in northern Uganda revisited. *International journal of cancer* **123**, 2658-2663 (2008).
- 92 Ojima, H., Fukuda, T., Nakajima, T., Takenoshita, S. & Nagamachi, Y. Discrepancy between clinical and pathological lymph node evaluation in Epstein-Barr virus-associated gastric cancers. *Anticancer research* **16**, 3081-3084 (1996).
- 93 Pallagani, L. *et al.* Epidemiology and clinicopathological profile of renal cell carcinoma: a review from tertiary care referral centre. *Journal of Kidney Cancer and VHL* **8**, 1 (2021).
- 94 Qiu, K. *et al.* Epstein-Barr virus in gastric carcinoma in Suzhou, China and Osaka, Japan: Association with clinico-pathologic factors and HLA-subtype. *International journal of cancer* **71**, 155-158 (1997).
- 95 Ragin, C., Modugno, F. & Gollin, S. The epidemiology and risk factors of head and neck cancer: a focus on human papillomavirus. *Journal of dental research* **86**, 104-114 (2007).
- 96 Rahbari, R., Zhang, L. & Kebebew, E. Thyroid cancer gender disparity. *Future Oncology* **6**, 1771-1779 (2010).
- 97 Randi, G., Franceschi, S. & La Vecchia, C. Gallbladder cancer worldwide: geographical distribution and risk factors. *International journal of cancer* **118**, 1591-1602 (2006).
- 98 Rawla, P. & Barsouk, A. Epidemiology of gastric cancer: global trends, risk factors and prevention. *Gastroenterology Review/Przegląd Gastroenterologiczny* **14**, 26-38 (2019).
- 99 Rowlands, D. *et al.* Epstein-Barr virus and carcinomas: rare association of the virus with gastric adenocarcinomas. *British journal of cancer* **68**, 1014-1019 (1993).

- 100 Sakuma, K. *et al.* Cancer risk to the gastric corpus in Japanese, its correlation with interleukin-1 $\beta$  gene polymorphism (+ 3953\* T) and Epstein-Barr virus infection. *International journal of cancer* **115**, 93-97 (2005).
- 101 Sellam, F. *et al.* Delayed diagnosis of pancreatic cancer reported as more common in a population of North African young adults. *Journal of gastrointestinal oncology* **6**, 505 (2015).
- 102 Shibata, D. & Weiss, L. Epstein-Barr virus-associated gastric adenocarcinoma. *The American journal of pathology* **140**, 769 (1992).
- 103 Shin, W. S. *et al.* Epstein-Barr virus-associated gastric adenocarcinomas among Koreans. *American journal of clinical pathology* **105**, 174-181 (1996).
- 104 Souza, E. M. *et al.* Impact of Epstein-Barr virus in the clinical evolution of patients with classical Hodgkin's lymphoma in Brazil. *Hematological Oncology* **28**, 137-141 (2010).
- 105 Takano, Y. *et al.* The role of the Epstein-Barr virus in the oncogenesis of EBV (+) gastric carcinomas. *Virchows Archiv* **434**, 17-22 (1999).
- 106 Tamási, L. *et al.* Age and Gender Specific Lung Cancer Incidence and Mortality in Hungary: Trends from 2011 Through 2016. *Pathology and Oncology Research*, 88 (2021).
- 107 Tamimi, A. F. & Juweid, M. Epidemiology and outcome of glioblastoma. *Exon Publications*, 143-153 (2017).
- 108 Tavakoli, A. *et al.* Association between Epstein-Barr virus infection and gastric cancer: a systematic review and meta-analysis. *BMC cancer* **20**, 1-14 (2020).
- 109 Tokunaga, M. *et al.* Epstein-Barr virus in gastric carcinoma. *The American journal of pathology* **143**, 1250 (1993).
- 110 van Beek, J. *et al.* EBV-positive gastric adenocarcinomas: a distinct clinicopathologic entity with a low frequency of lymph node involvement. *Journal of Clinical Oncology* **22**, 664-670 (2004).
- 111 Venook, A. P., Papandreou, C., Furuse, J. & Ladrón de Guevara, L. The incidence and epidemiology of hepatocellular carcinoma: a global and regional perspective. *The oncologist* **15**, 5-13 (2010).
- 112 Villano, J., Koshy, M., Shaikh, H., Dolecek, T. & McCarthy, B. Age, gender, and racial differences in incidence and survival in primary CNS lymphoma. *British journal of cancer* **105**, 1414-1418 (2011).
- 113 Wang, X. m. *et al.* Clinical analysis of 1629 newly diagnosed malignant lymphomas in current residents of Sichuan province, China. *Hematological oncology* **34**, 193-199 (2016).
- 114 Wang, Y. *et al.* Quantitative methylation analysis reveals gender and age differences in p16 INK 4a hypermethylation in hepatitis B virus-related hepatocellular carcinoma. *Liver International* **32**, 420-428 (2012).
- 115 Wei, K.-R. *et al.* Nasopharyngeal carcinoma incidence and mortality in China in 2010. *Chinese journal of cancer* **33**, 381 (2014).
- 116 Wu, M. S. *et al.* Epstein-Barr virus-associated gastric carcinomas: relation to H. pylori infection and genetic alterations. *Gastroenterology* **118**, 1031-1038 (2000).
- 117 Wu, S., Han, J., Li, W.-Q., Li, T. & Qureshi, A. A. Basal-cell carcinoma incidence and associated risk factors in US women and men. *American journal of epidemiology* **178**, 890-897 (2013).

- 118 Yanai, H. *et al.* Endoscopic and pathologic features of Epstein-Barr virus-associated gastric carcinoma. *Gastrointestinal endoscopy* **45**, 236-242 (1997).
- 119 Yoshiwara, E. *et al.* Epstein-Barr virus-associated gastric carcinoma in Lima, Peru. *J Exp Clin Cancer Res* **24**, 49-54 (2005).
- 120 Zhou, L. *et al.* Global, regional, and national burden of Hodgkin lymphoma from 1990 to 2017: estimates from the 2017 Global Burden of Disease study. *Journal of hematology & oncology* **12**, 1-13 (2019).
- 121 Zhu, Z.-Z. *et al.* Sex-related differences in DNA copy number alterations in hepatitis B virus-associated hepatocellular carcinoma. *Asian Pacific Journal of Cancer Prevention* **13**, 225-229 (2012).
- 122 Dozzo, M. *et al.* Burkitt lymphoma in adolescents and young adults: management challenges. *Adolescent Health, Medicine and Therapeutics Volume* **8**, 11-29 (2016). [https://doi.org:10.2147/ahmt.s94170](https://doi.org/10.2147/ahmt.s94170)
- 123 Rismiller, K. & Knackstedt, T. J. Aggressive Digital Papillary Adenocarcinoma: Population-Based Analysis of Incidence, Demographics, Treatment, and Outcomes. *Dermatol Surg* **44**, 911-917 (2018). [https://doi.org:10.1097/DSS.0000000000001483](https://doi.org/10.1097/DSS.0000000000001483)
- 124 Li, X., Fasano, R., Wang, E., Yao, K.-T. & Marincola, F. M. HLA associations with nasopharyngeal carcinoma. *Current molecular medicine* **9**, 751-765 (2009).
- 125 Huang, X. *et al.* HLA-A\* 02: 07 is a protective allele for EBV negative and a susceptibility allele for EBV positive classical Hodgkin lymphoma in China. *PLoS One* **7**, e31865 (2012).
- 126 Schottenfeld, D. & Beebe-Dimmer, J. The cancer burden attributable to biologic agents. *Annals of Epidemiology* **25**, 183-187 (2015).
- 127 Jemal, A., Center, M. M., DeSantis, C. & Ward, E. M. Global Patterns of Cancer Incidence and Mortality Rates and Trends Global Patterns of Cancer. *Cancer epidemiology, biomarkers & prevention* **19**, 1893-1907 (2010).
- 128 Tiacci, E. *et al.* Pervasive mutations of JAK-STAT pathway genes in classical Hodgkin lymphoma. *Blood* **131**, 2454-2465 (2018). [https://doi.org:10.1182/blood-2017-11-814913](https://doi.org/10.1182/blood-2017-11-814913)
- 129 Wienand, K. *et al.* Genomic analyses of flow-sorted Hodgkin Reed-Sternberg cells reveal complementary mechanisms of immune evasion. *Blood Adv* **3**, 4065-4080 (2019). [https://doi.org:10.1182/bloodadvances.2019001012](https://doi.org/10.1182/bloodadvances.2019001012)
- 130 Liu, Z. *et al.* Genomic characterization of HIV-associated plasmablastic lymphoma identifies pervasive mutations in the JAK-STAT pathway. *Blood Cancer Discov* **1**, 112-125 (2020). [https://doi.org:10.1158/2643-3230.BCD-20-0051](https://doi.org/10.1158/2643-3230.BCD-20-0051)
- 131 The Cancer Genome Atlas Research Network. Comprehensive molecular characterization of gastric adenocarcinoma. *Nature* **513**, 202-209 (2014). [https://doi.org:10.1038/nature13480](https://doi.org/10.1038/nature13480)
- 132 The Cancer Genome Atlas Research Network. Comprehensive and Integrative Genomic Characterization of Hepatocellular Carcinoma. *Cell* **169**, 1327-1341 e1323 (2017). [https://doi.org:10.1016/j.cell.2017.05.046](https://doi.org/10.1016/j.cell.2017.05.046)
- 133 The Cancer Genome Atlas Research Network. Integrated genomic and molecular characterization of cervical cancer. *Nature* **543**, 378-384 (2017). [https://doi.org:10.1038/nature21386](https://doi.org/10.1038/nature21386)



- 134 The Cancer Genome Atlas Network. Comprehensive genomic characterization of head and neck squamous cell carcinomas. *Nature* **517**, 576-582 (2015). <https://doi.org/10.1038/nature14129>
- 135 Ramis-Zaldivar, J. E. *et al.* MAPK and JAK-STAT pathways dysregulation in plasmablastic lymphoma. *Haematologica* **106**, 2682-2693 (2021). <https://doi.org/10.3324/haematol.2020.271957>
- 136 Gandhi, M. K. *et al.* EBV-associated primary CNS lymphoma occurring after immunosuppression is a distinct immunobiological entity. *Blood* **137**, 1468-1477 (2021). <https://doi.org/10.1182/blood.2020008520>
- 137 Starrett, G. J. *et al.* Clinical and molecular characterization of virus-positive and virus-negative Merkel cell carcinoma. *Genome Med* **12**, 30 (2020). <https://doi.org/10.1186/s13073-020-00727-4>
- 138 Bleyer, A., O'leary, M., Barr, R. & Ries, L. Cancer epidemiology in older adolescents and young adults 15 to 29 years of age, including SEER incidence and survival: 1975-2000. *Cancer epidemiology in older adolescents and young adults 15 to 29 years of age, including SEER incidence and survival: 1975-2000*. (2006).
- 139 Gopas, J. *et al.* Reed-Sternberg cells in Hodgkin's lymphoma present features of cellular senescence. *Cell Death Dis* **7**, e2457 (2016). <https://doi.org/10.1038/cddis.2016.185>
- 140 Spina, V. *et al.* Circulating tumor DNA reveals genetics, clonal evolution, and residual disease in classical Hodgkin lymphoma. *Blood* **131**, 2413-2425 (2018). <https://doi.org/10.1182/blood-2017-11-812073>
- 141 Tiacci, E. *et al.* Pervasive mutations of JAK-STAT pathway genes in classical Hodgkin lymphoma. *Blood* **131**, 2454-2465 (2018).
- 142 Alexandrov, L. B. *et al.* The repertoire of mutational signatures in human cancer. *Nature* **578**, 94-101 (2020). <https://doi.org/10.1038/s41586-020-1943-3>
- 143 Liso, A. *et al.* Aberrant somatic hypermutation in tumor cells of nodular-lymphocyte-predominant and classic Hodgkin lymphoma. *Blood* **108**, 1013-1020 (2006). <https://doi.org/10.1182/blood-2005-10-3949>
- 144 Schmitz, R. *et al.* Genetics and pathogenesis of diffuse large B-cell lymphoma. *New England Journal of Medicine* **378**, 1396-1407 (2018).
- 145 Henderson, S., Chakravarthy, A., Su, X., Boshoff, C. & Fenton, T. R. APOBEC-mediated cytosine deamination links PIK3CA helical domain mutations to human papillomavirus-driven tumor development. *Cell reports* **7**, 1833-1841 (2014).
- 146 Warren, C. J., Westrich, J. A., Van Doorslaer, K. & Pyeon, D. Roles of APOBEC3A and APOBEC3B in human papillomavirus infection and disease progression. *Viruses* **9**, 233 (2017).
- 147 Chu, Y.-J. *et al.* Aflatoxin B1 exposure increases the risk of hepatocellular carcinoma associated with hepatitis C virus infection or alcohol consumption. *European Journal of Cancer* **94**, 37-46 (2018).
- 148 Chu, Y. J. *et al.* Aflatoxin B1 exposure increases the risk of cirrhosis and hepatocellular carcinoma in chronic hepatitis B virus carriers. *International journal of cancer* **141**, 711-720 (2017).
- 149 Grande, B. M. *et al.* Genome-wide discovery of somatic coding and noncoding mutations in pediatric endemic and sporadic Burkitt lymphoma. *Blood* **133**, 1313-1324 (2019).

- 150 López, C. *et al.* Genomic and transcriptomic changes complement each other in the pathogenesis of sporadic Burkitt lymphoma. *Nature Communications* **10** (2019). <https://doi.org/10.1038/s41467-019-08578-3>
- 151 Abate, F. *et al.* Distinct Viral and Mutational Spectrum of Endemic Burkitt Lymphoma. *PLOS Pathogens* **11**, e1005158 (2015). <https://doi.org/10.1371/journal.ppat.1005158>
- 152 Zhou, P. X. *et al.* Sporadic and endemic Burkitt lymphoma have frequent FOXO1 mutations but distinct hotspots in the AKT recognition motif. *Blood Advances* **3**, 2118-2127 (2019). <https://doi.org/10.1182/bloodadvances.2018029546>
- 153 Kaymaz, Y. *et al.* Comprehensive Transcriptome and Mutational Profiling of Endemic Burkitt Lymphoma Reveals EBV Type-Specific Differences. *Molecular Cancer Research* **15**, 563-576 (2017). <https://doi.org/10.1158/1541-7786.mcr-16-0305-t>
- 154 Gong, C. *et al.* Sequential inverse dysregulation of the RNA helicases DDX3X and DDX3Y facilitates MYC-driven lymphomagenesis. *Mol Cell* **81**, 4059-4075 e4011 (2021). <https://doi.org/10.1016/j.molcel.2021.07.041>
- 155 Rocak, S. & Linder, P. DEAD-box proteins: the driving forces behind RNA metabolism. *Nat Rev Mol Cell Biol* **5**, 232-241 (2004). <https://doi.org/10.1038/nrm1335>
- 156 Dufva, O. *et al.* Aggressive natural killer-cell leukemia mutational landscape and drug profiling highlight JAK-STAT signaling as therapeutic target. *Nat Commun* **9**, 1567 (2018). <https://doi.org/10.1038/s41467-018-03987-2>
- 157 Kataoka, K. *et al.* Integrated molecular analysis of adult T cell leukemia/lymphoma. *Nat Genet* **47**, 1304-1315 (2015). <https://doi.org/10.1038/ng.3415>
- 158 Xiong, J. *et al.* Genomic and Transcriptomic Characterization of Natural Killer T Cell Lymphoma. *Cancer Cell* **37**, 403-419 e406 (2020). <https://doi.org/10.1016/j.ccell.2020.02.005>
- 159 Zhang, L. *et al.* Genomic Analysis of Nasopharyngeal Carcinoma Reveals TME-Based Subtypes. *Mol Cancer Res* **15**, 1722-1732 (2017). <https://doi.org/10.1158/1541-7786.MCR-17-0134>
- 160 Mo, J. *et al.* DDX3X: structure, physiologic functions and cancer. *Mol Cancer* **20**, 38 (2021). <https://doi.org/10.1186/s12943-021-01325-7>
- 161 Thomas, N. *et al.* Genetic Subgroups Inform on Pathobiology in Adult and Pediatric Burkitt Lymphoma. *Blood* **blood.2022016534** (2022). <https://doi.org/10.1182/blood.2022016534>
- 162 Fangazio, M. *et al.* Genetic mechanisms of HLA-I loss and immune escape in diffuse large B cell lymphoma. *Proc Natl Acad Sci U S A* **118**, e2104504118 (2021). <https://doi.org/10.1073/pnas.2104504118>
- 163 Sudlow, C. *et al.* UK biobank: an open access resource for identifying the causes of a wide range of complex diseases of middle and old age. *PLoS Med* **12**, e1001779 (2015). <https://doi.org/10.1371/journal.pmed.1001779>
- 164 Consortium, G. T. The Genotype-Tissue Expression (GTEx) project. *Nat Genet* **45**, 580-585 (2013). <https://doi.org/10.1038/ng.2653>
- 165 Niens, M. *et al.* HLA-A\*02 is associated with a reduced risk and HLA-A\*01 with an increased risk of developing EBV+ Hodgkin lymphoma. *Blood* **110**, 3310-3315 (2007). <https://doi.org/10.1182/blood-2007-05-086934>

- 166 Formica, V. *et al.* A systematic review and meta-analysis of PD-1/PD-L1 inhibitors in specific patient subgroups with advanced gastro-oesophageal junction and gastric adenocarcinoma. *Crit Rev Oncol Hematol* **157**, 103-173 (2021). <https://doi.org/10.1016/j.critrevonc.2020.103173>
- 167 De Meulenaere, A. *et al.* Turning the tide: Clinical utility of PD-L1 expression in squamous cell carcinoma of the head and neck. *Oral Oncol* **70**, 34-42 (2017). <https://doi.org/10.1016/j.oraloncology.2017.05.002>
- 168 Lipson, E. J. *et al.* PD-L1 expression in the Merkel cell carcinoma microenvironment: association with inflammation, Merkel cell polyomavirus and overall survival. *Cancer Immunol Res* **1**, 54-63 (2013). <https://doi.org/10.1158/2326-6066.CIR-13-0034>
- 169 Derks, S. *et al.* Abundant PD-L1 expression in Epstein-Barr Virus-infected gastric cancers. *Oncotarget* **7**, 32925-32932 (2016). <https://doi.org/10.18632/oncotarget.9076>
- 170 Yang, W. F., Wong, M. C. M., Thomson, P. J., Li, K. Y. & Su, Y. X. The prognostic role of PD-L1 expression for survival in head and neck squamous cell carcinoma: A systematic review and meta-analysis. *Oral Oncol* **86**, 81-90 (2018). <https://doi.org/10.1016/j.oraloncology.2018.09.016>
- 171 Li, B. *et al.* Anti-PD-1/PD-L1 Blockade Immunotherapy Employed in Treating Hepatitis B Virus Infection-Related Advanced Hepatocellular Carcinoma: A Literature Review. *Front Immunol* **11**, 1037 (2020). <https://doi.org/10.3389/fimmu.2020.01037>
- 172 Blumberg, B. S. The curiosities of hepatitis B virus: prevention, sex ratio, and demography. *Proc Am Thorac Soc* **3**, 14-20 (2006). <https://doi.org/10.1513/pats.200510-108JH>
- 173 Fish, E. N. The X-files in immunity: sex-based differences predispose immune responses. *Nat Rev Immunol* **8**, 737-744 (2008). <https://doi.org/10.1038/nri2394>
- 174 Klein, S. L. & Flanagan, K. L. Sex differences in immune responses. *Nat Rev Immunol* **16**, 626-638 (2016). <https://doi.org/10.1038/nri.2016.90>
- 175 Mathas, S., Hartmann, S. & Kuppers, R. Hodgkin lymphoma: Pathology and biology. *Semin Hematol* **53**, 139-147 (2016). <https://doi.org/10.1053/j.seminhematol.2016.05.007>
- 176 Zhang, B. L. *et al.* Somatic mutation profiling of liver and biliary cancer by targeted next generation sequencing. *Oncol Lett* **16**, 6003-6012 (2018). <https://doi.org/10.3892/ol.2018.9371>
- 177 Zhao, L. H. *et al.* Genomic and oncogenic preference of HBV integration in hepatocellular carcinoma. *Nat Commun* **7**, 12992 (2016). <https://doi.org/10.1038/ncomms12992>
- 178 Tornesello, M. L. *et al.* Mutations in TP53, CTNNB1 and PIK3CA genes in hepatocellular carcinoma associated with hepatitis B and hepatitis C virus infections. *Genomics* **102**, 74-83 (2013). <https://doi.org/10.1016/j.ygeno.2013.04.001>
- 179 Riva, V. & Maga, G. From the magic bullet to the magic target: exploiting the diverse roles of DDX3X in viral infections and tumorigenesis. *Future Med Chem* **11**, 1357-1381 (2019). <https://doi.org/10.4155/fmc-2018-0451>
- 180 He, Y. *et al.* A double-edged function of DDX3, as an oncogene or tumor suppressor, in cancer progression (Review). *Oncol Rep* **39**, 883-892 (2018). <https://doi.org/10.3892/or.2018.6203>

- 181 Chatterjee, K., Das, P., Chattopadhyay, N. R., Mal, S. & Choudhuri, T. The interplay  
between Epstein-Bar virus (EBV) with the p53 and its homologs during EBV associated  
malignancies. *Heliyon* **5**, e02624 (2019). <https://doi.org/10.1016/j.heliyon.2019.e02624>
- 182 Nijland, M. *et al.* in *Oncoimmunology* Vol. 6 (2017).
- 183 Hwang, J. *et al.* The incidence of Epstein-Barr virus-positive diffuse large B-cell  
lymphoma: a systematic review and meta-analysis. *Cancers* **13**, 1785 (2021).
- 184 Miliotis, C. N. & Slack, F. J. Multi-layered control of PD-L1 expression in Epstein-Barr  
virus-associated gastric cancer. *J Cancer Metastasis Treat* **6** (2020).  
<https://doi.org/10.20517/2394-4722.2020.12>
- 185 Ukpo, O. C., Thorstad, W. L. & Lewis, J. S., Jr. B7-H1 expression model for immune  
evasion in human papillomavirus-related oropharyngeal squamous cell carcinoma. *Head  
Neck Pathol* **7**, 113-121 (2013). <https://doi.org/10.1007/s12105-012-0406-z>
- 186 Lyford-Pike, S. *et al.* Evidence for a role of the PD-1:PD-L1 pathway in immune resistance  
of HPV-associated head and neck squamous cell carcinoma. *Cancer Res* **73**, 1733-1741  
(2013). <https://doi.org/10.1158/0008-5472.CAN-12-2384>
- 187 Kim, H. S. *et al.* Association Between PD-L1 and HPV Status and the Prognostic Value of  
PD-L1 in Oropharyngeal Squamous Cell Carcinoma. *Cancer Res Treat* **48**, 527-536 (2016).  
<https://doi.org/10.4143/crt.2015.249>
- 188 Badoual, C. *et al.* PD-1-expressing tumor-infiltrating T cells are a favorable prognostic  
biomarker in HPV-associated head and neck cancer. *Cancer Res* **73**, 128-138 (2013).  
<https://doi.org/10.1158/0008-5472.CAN-12-2606>
- 189 Oliva, M. *et al.* Immune biomarkers of response to immune-checkpoint inhibitors in  
head and neck squamous cell carcinoma. *Ann Oncol* **30**, 57-67 (2019).  
<https://doi.org/10.1093/annonc/mdy507>
- 190 Beerenwinkel, N. *et al.* Genetic progression and the waiting time to cancer. *PLoS  
Comput Biol* **3**, e225 (2007). <https://doi.org/10.1371/journal.pcbi.0030225>
- 191 DePristo, M. A. *et al.* A framework for variation discovery and genotyping using next-  
generation DNA sequencing data. *Nature genetics* **43**, 491-498 (2011).
- 192 Van der Auwera, G. A. *et al.* From FastQ data to high-confidence variant calls: the  
genome analysis toolkit best practices pipeline. *Current protocols in bioinformatics* **43**,  
11.10. 11-11.10. 33 (2013).
- 193 Trifonov, V., Pasqualucci, L., Tiacci, E., Falini, B. & Rabadan, R. SAVI: a statistical  
algorithm for variant frequency identification. *BMC Syst Biol* **7 Suppl 2**, S2 (2013).  
<https://doi.org/10.1186/1752-0509-7-S2-S2>
- 194 Shinde, J. *et al.* Palimpsest: an R package for studying mutational and structural variant  
signatures along clonal evolution in cancer. *Bioinformatics* **34**, 3380-3381 (2018).  
<https://doi.org/10.1093/bioinformatics/bty388>
- 195 Chapuy, B. *et al.* Molecular subtypes of diffuse large B cell lymphoma are associated  
with distinct pathogenic mechanisms and outcomes. *Nat Med* **24**, 679-690 (2018).  
<https://doi.org/10.1038/s41591-018-0016-8>
- 196 Petljak, M. *et al.* Characterizing mutational signatures in human cancer cell lines reveals  
episodic APOBEC mutagenesis. *Cell* **176**, 1282-1294. e1220 (2019).



- 197 Boeva, V. *et al.* Control-FREEC: a tool for assessing copy number and allelic content using next-generation sequencing data. *Bioinformatics* **28**, 423-425 (2012). <https://doi.org/10.1093/bioinformatics/btr670>
- 198 Favero, F. *et al.* Sequenza: allele-specific copy number and mutation profiles from tumor sequencing data. *Ann Oncol* **26**, 64-70 (2015). <https://doi.org/10.1093/annonc/mdu479>
- 199 Mermel, C. H. *et al.* GISTIC2.0 facilitates sensitive and confident localization of the targets of focal somatic copy-number alteration in human cancers. *Genome Biol* **12**, R41 (2011). <https://doi.org/10.1186/gb-2011-12-4-r41>
- 200 Tso, F. Y. *et al.* RNA-Seq of Kaposi's sarcoma reveals alterations in glucose and lipid metabolism. *PLoS Pathog* **14**, e1006844 (2018). <https://doi.org/10.1371/journal.ppat.1006844>
- 201 Orenbuch, R. *et al.* arcasHLA: high-resolution HLA typing from RNAseq. *Bioinformatics* **36**, 33-40 (2020). <https://doi.org/10.1093/bioinformatics/btz474>
- 202 Thorsson, V. *et al.* The Immune Landscape of Cancer. *Immunity* **48**, 812-830 e814 (2018). <https://doi.org/10.1016/j.immuni.2018.03.023>
- 203 McGranahan, N. *et al.* Allele-Specific HLA Loss and Immune Escape in Lung Cancer Evolution. *Cell* **171**, 1259-1271 e1211 (2017). <https://doi.org/10.1016/j.cell.2017.10.001>

Fig 1

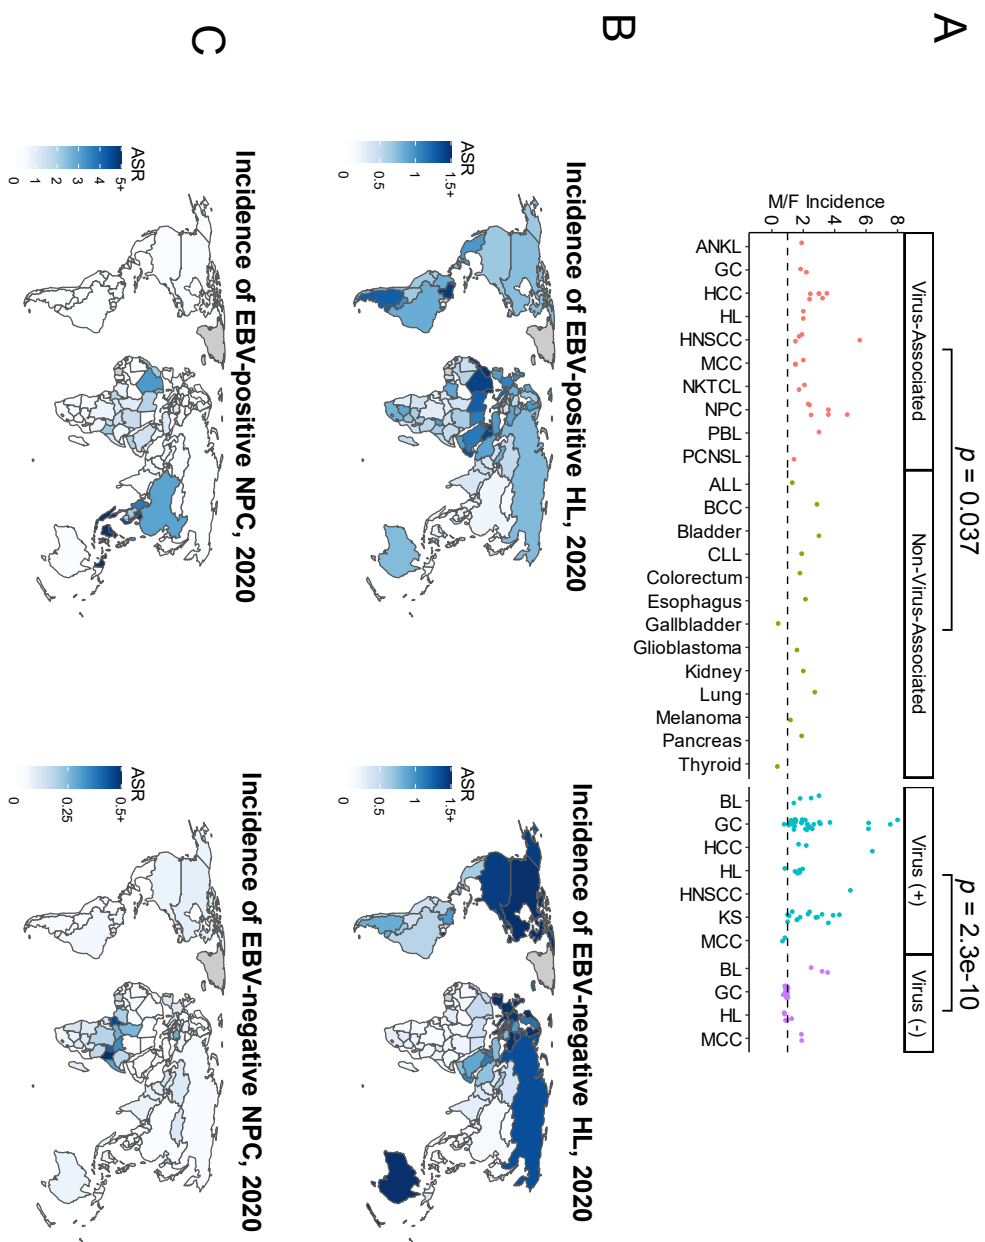

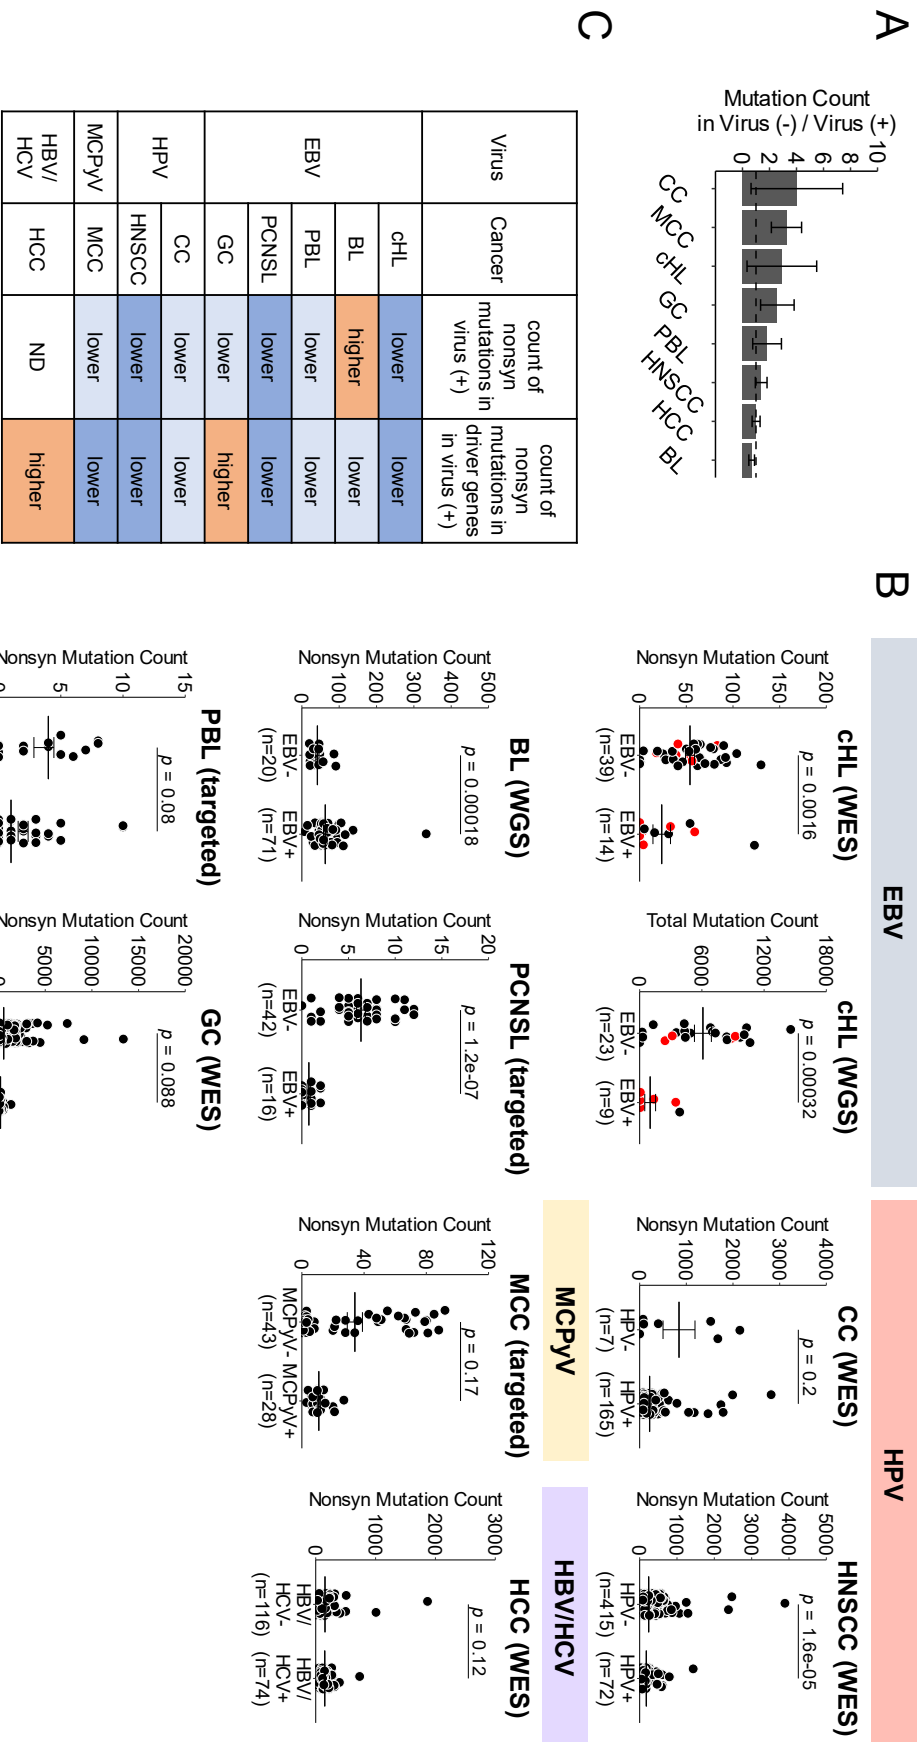

Fig 2

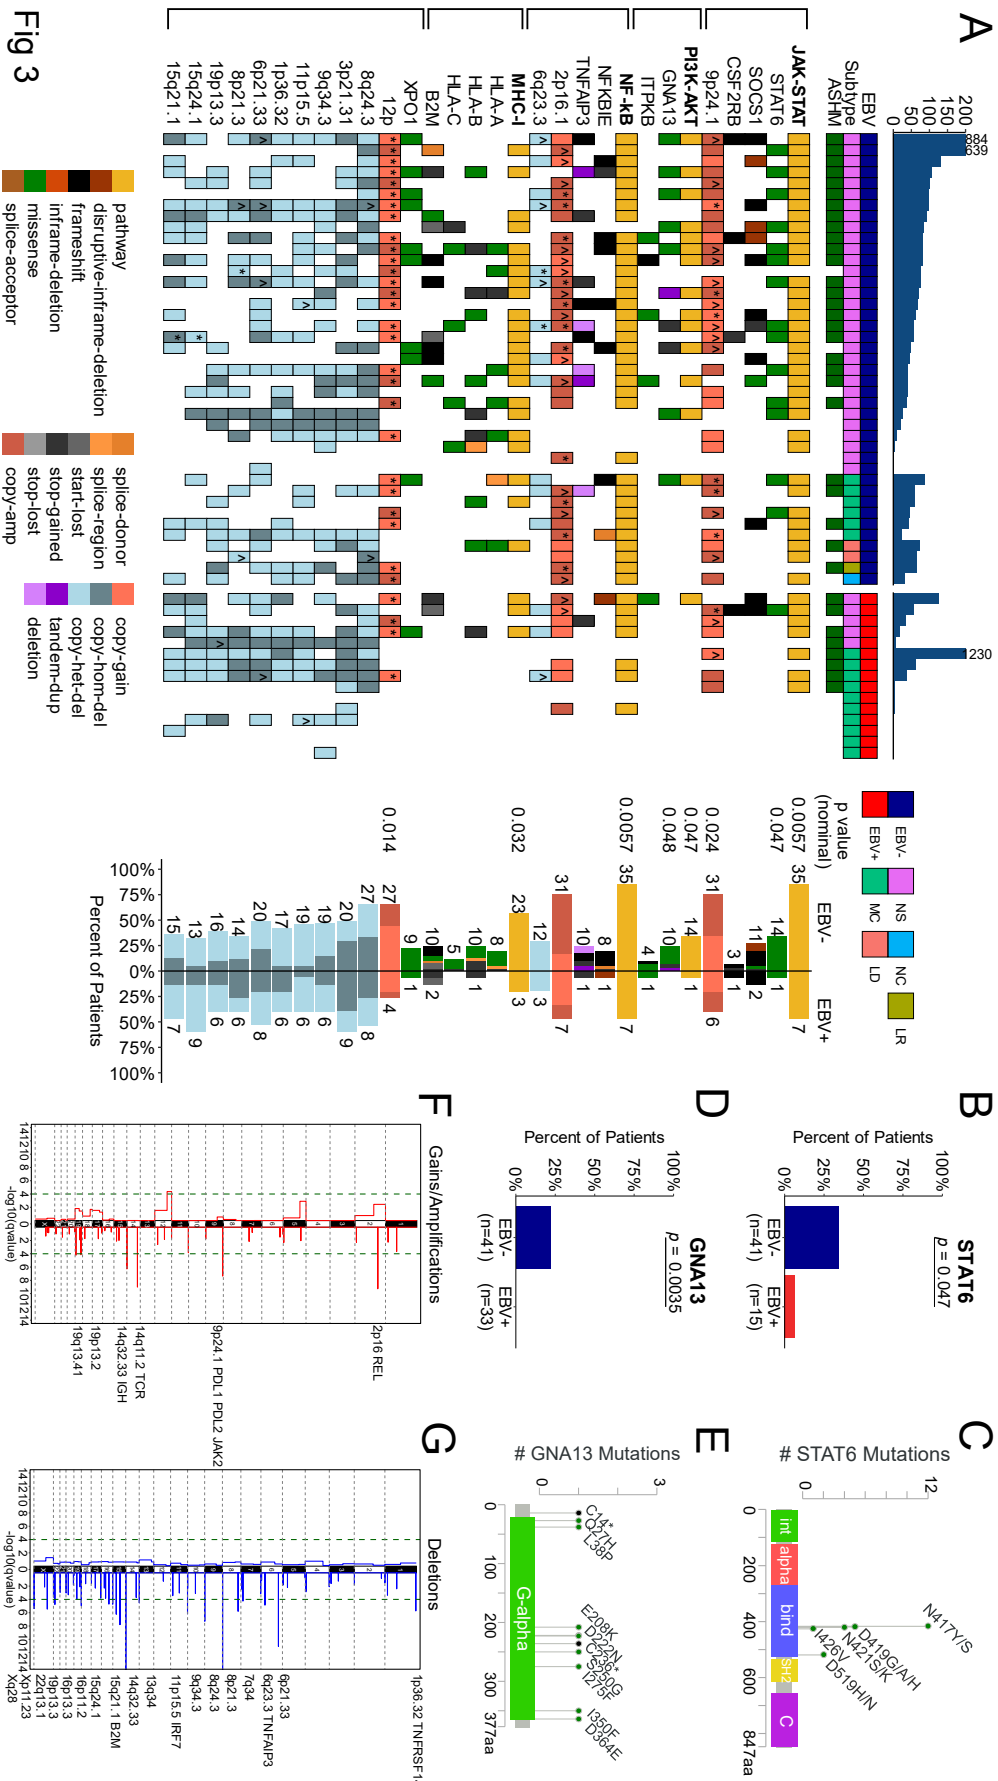

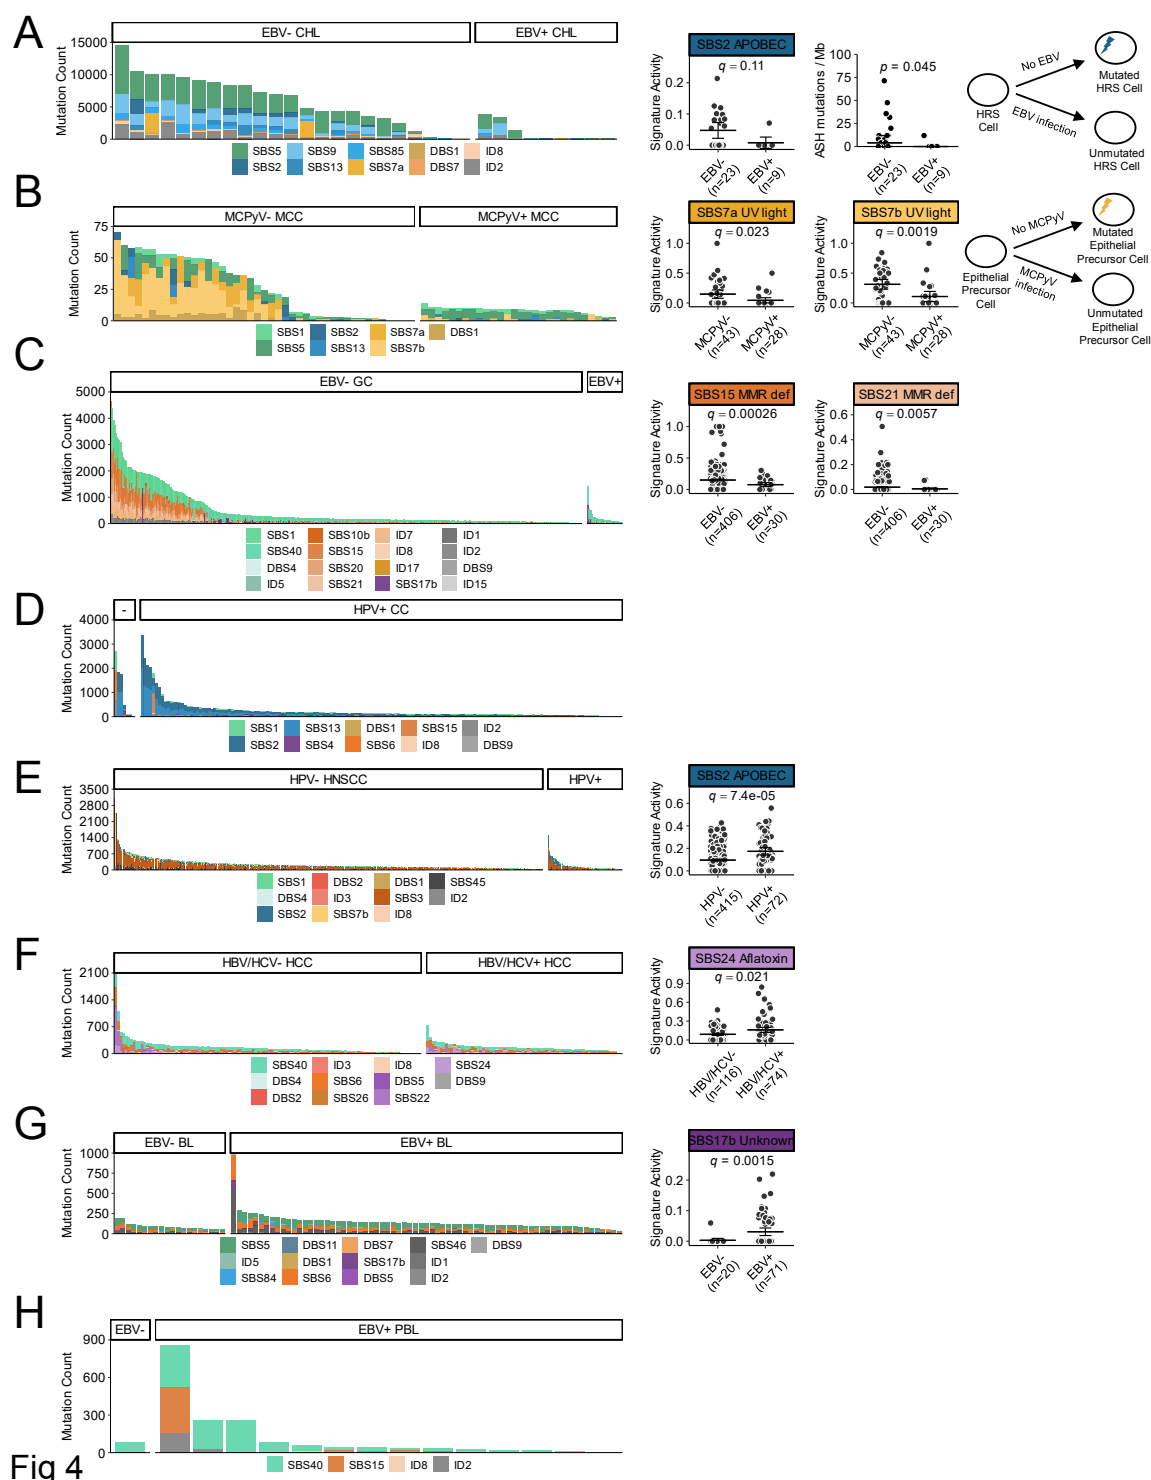

Fig 4

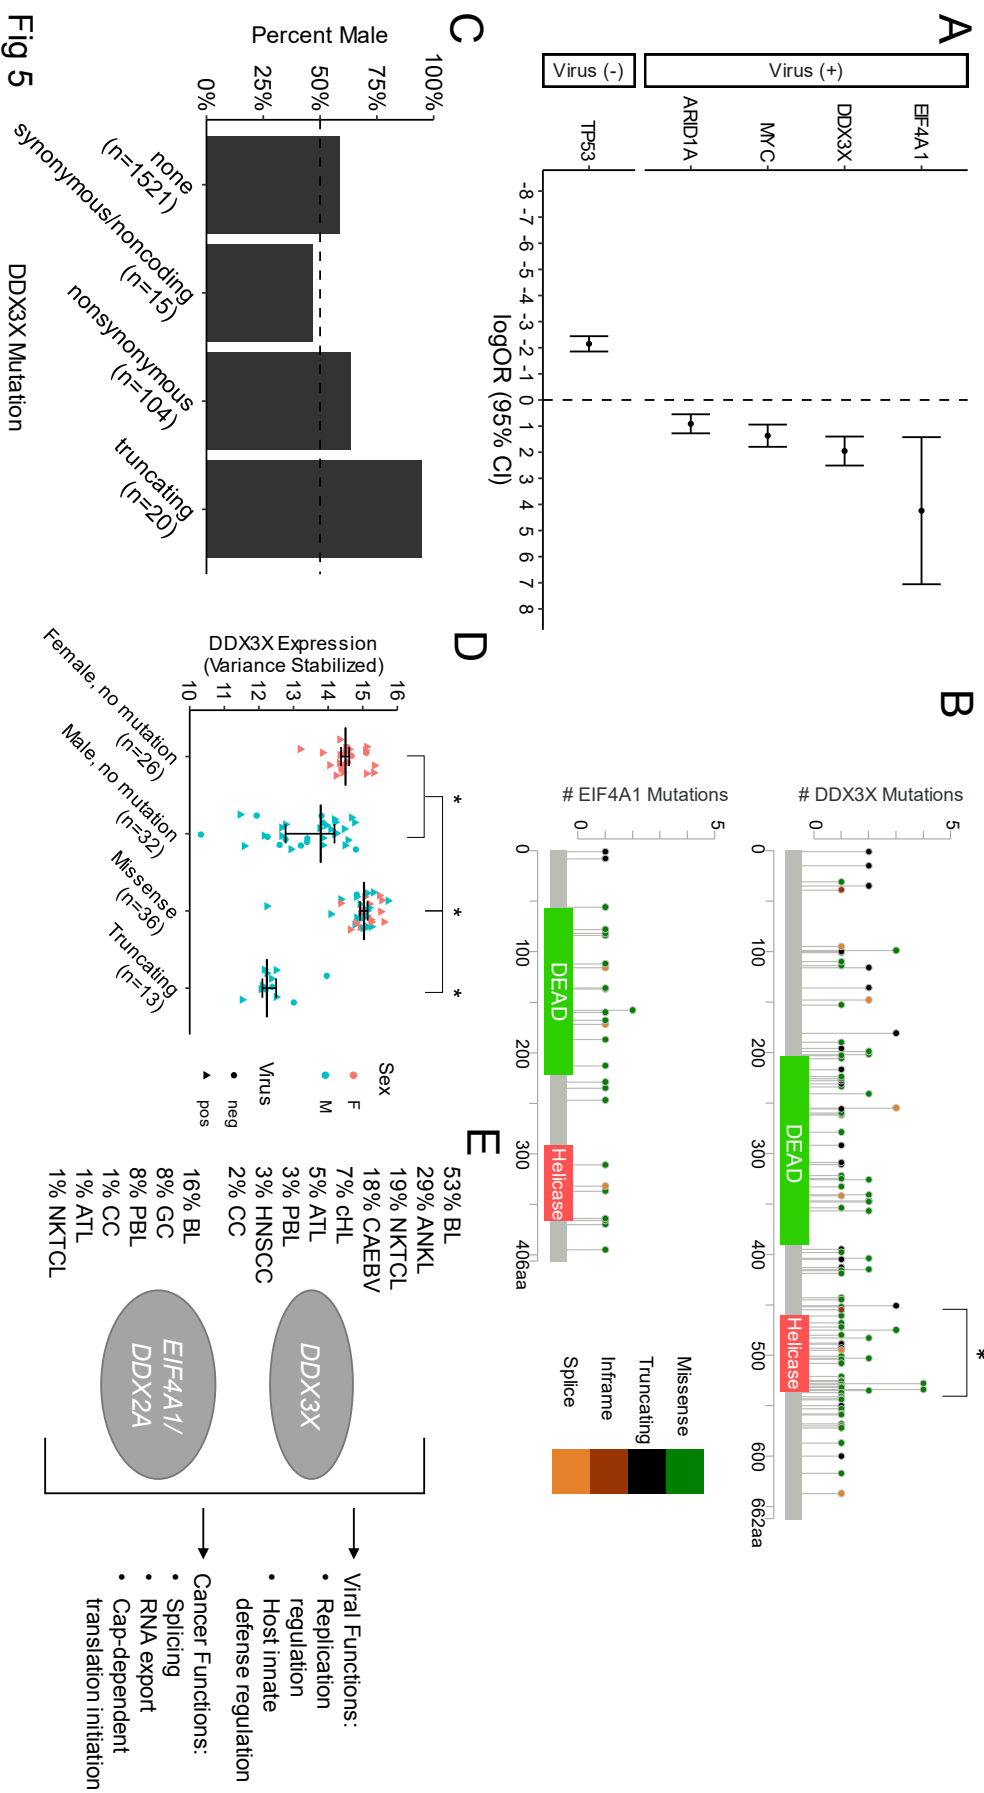

Fig 5



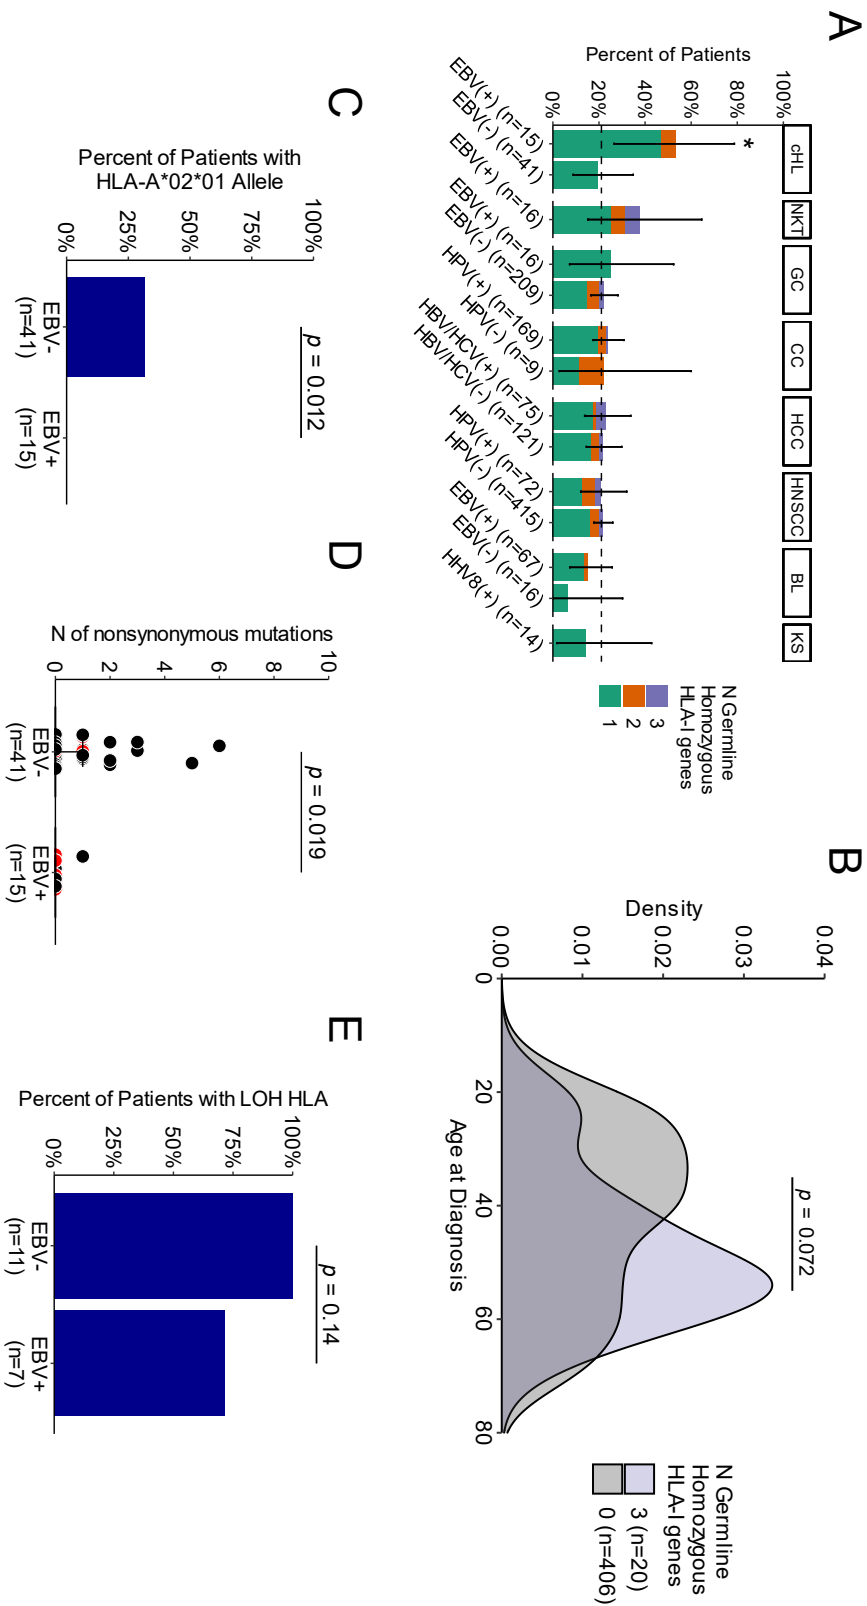

Fig 6

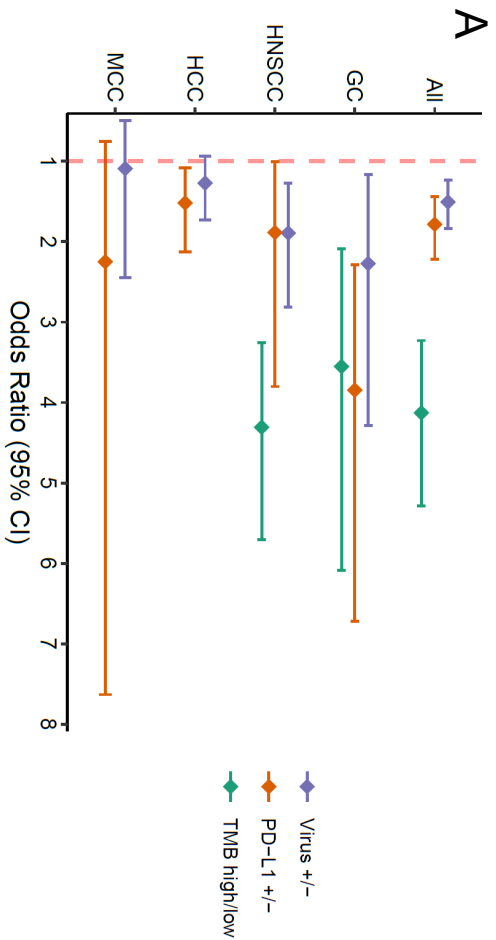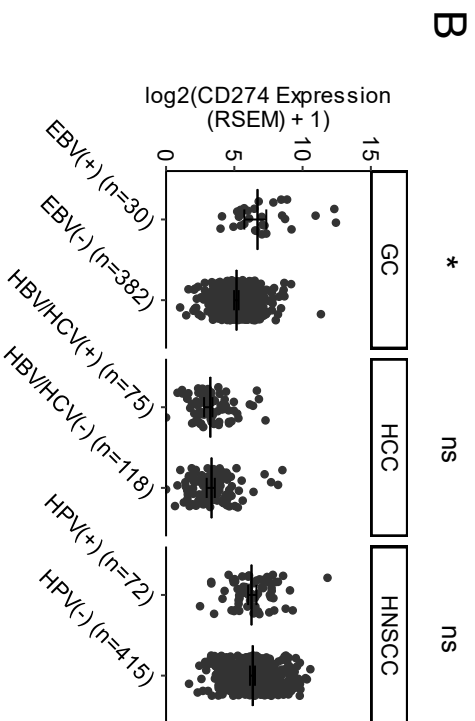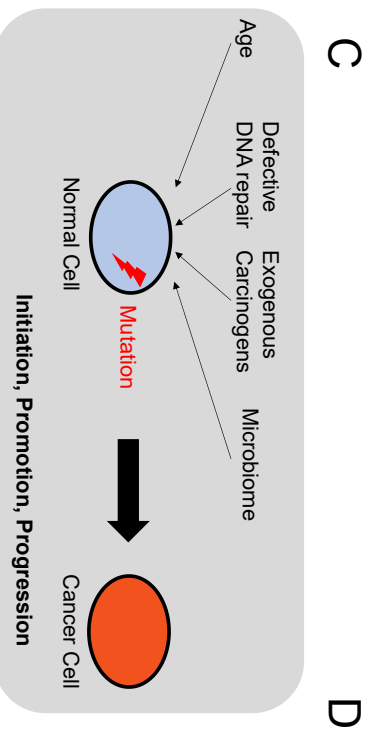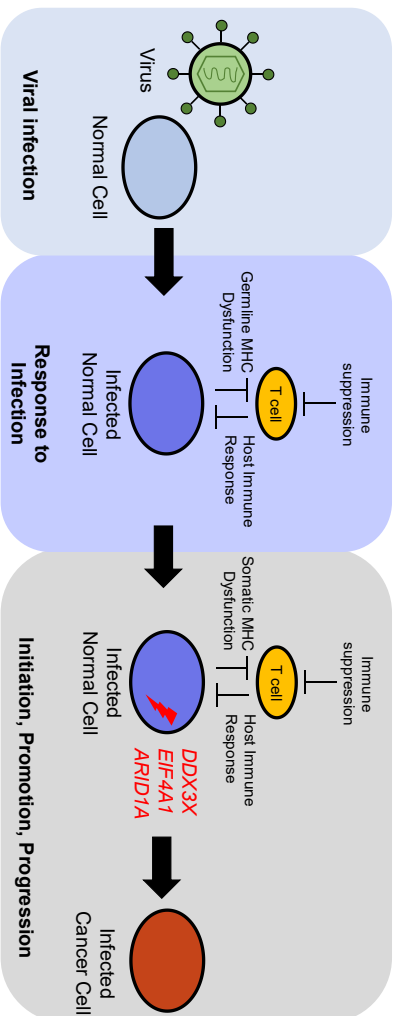

Fig 7
